# Supplementary material for: Impact of Dietary Resistant Starch on the Human Gut Microbiome, Metaproteome, and Metabolome
Source: PubMed Central journal article supplement (PMC5646248; doi:10.1128/mbio.01343-17), 2017-10-17

BASELINE

**Hexadecenoic acid  
C16:1**

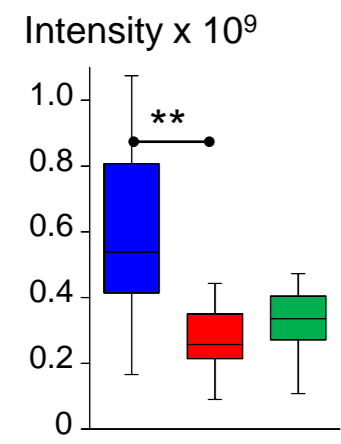

**Octadecadienoic acid  
C18:2**

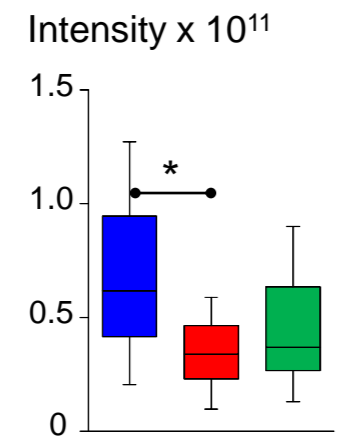

**Octadecenoic acid  
C18:1**

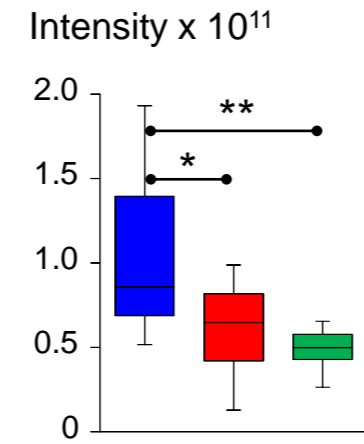

LRS

**Decanoic acid  
C10:0**

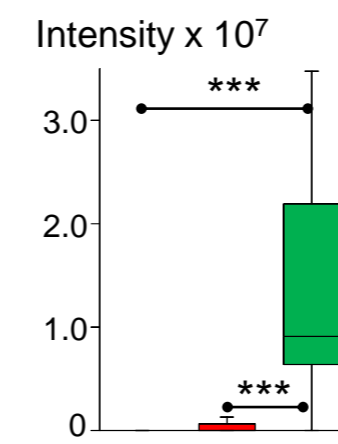

**Dodecanoic acid  
C12:0**

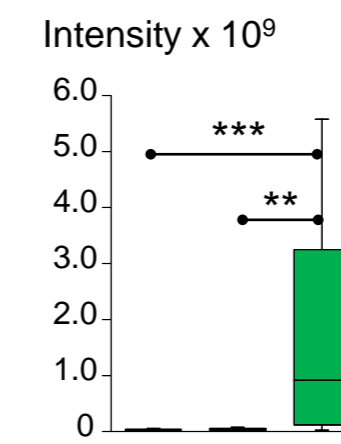

**Tetradecanoic acid  
C14:0**

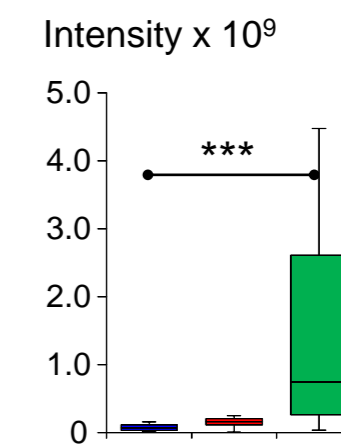

HRS

**Heptadecanoic acid  
(C17:0)**

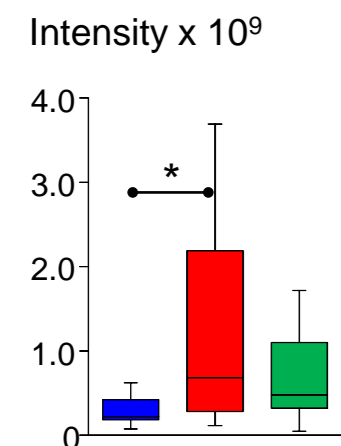

**Octadecanoic acid  
(C18:0)**

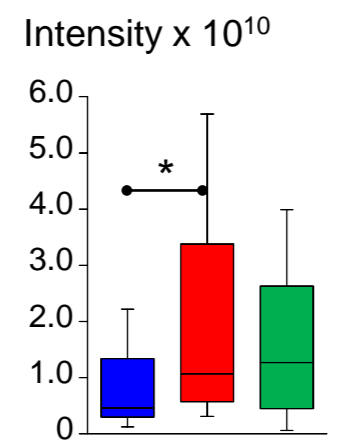

**Nonadecanoic acid  
(C19:0)**

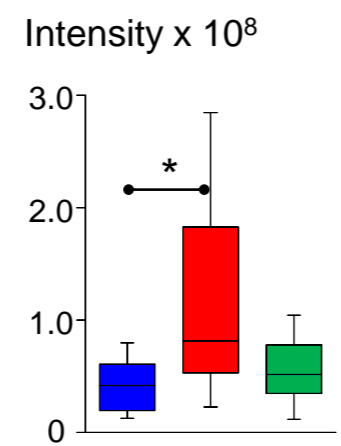

**Icosanoic acid  
(C20:0)**

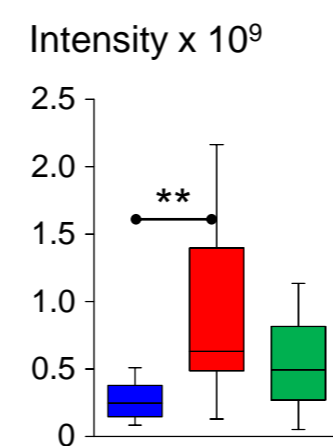

**Docosanoic acid  
(C22:0)**

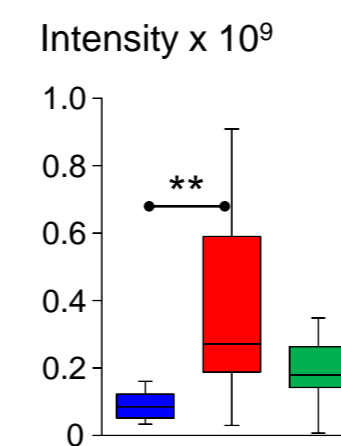

**Tricosanoic acid  
(C23:0)**

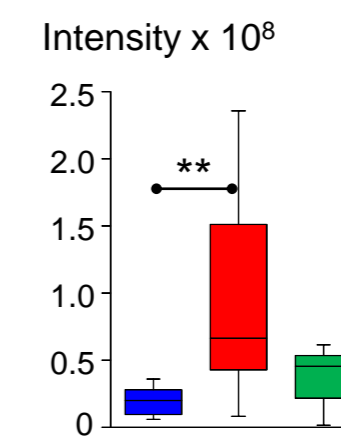

**Tetracosanoic acid  
(C24:0)**

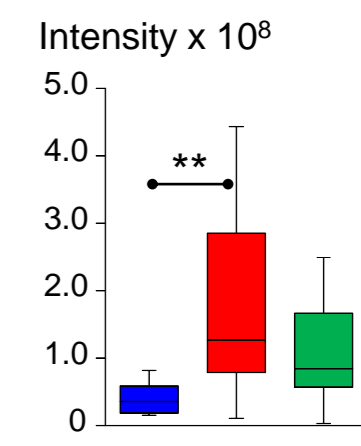

**Pentacosanoic acid  
(C25:0)**

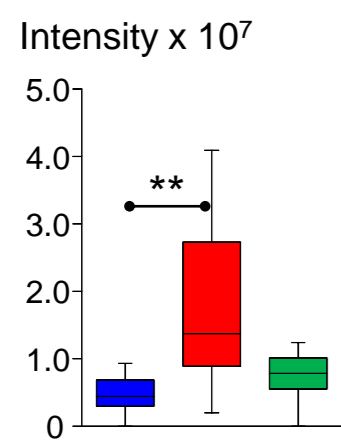

**Hexacosanoic acid  
(C26:0)**

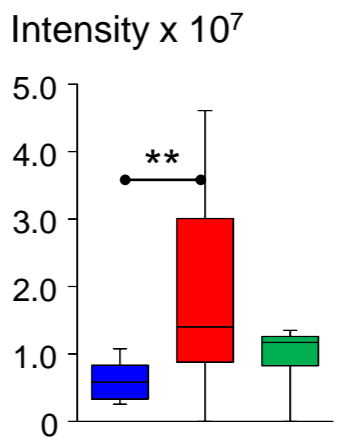

**Icosapentaenoic acid  
(C20:5)**

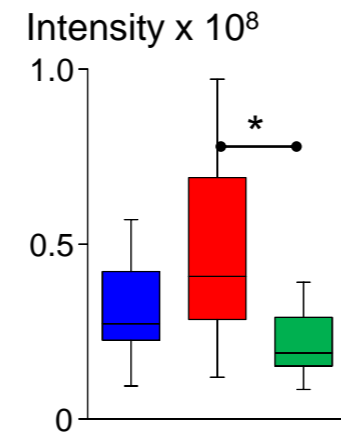

**Icosenoic acid  
(C20:1)**

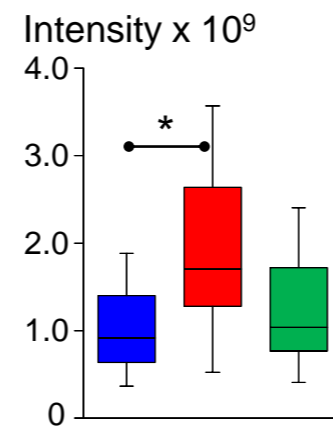

**Heneicosenoic acid  
(C21:1)**

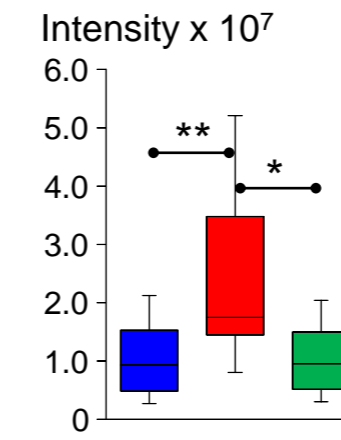

**Docosatrienoic acid  
(C22:3)**

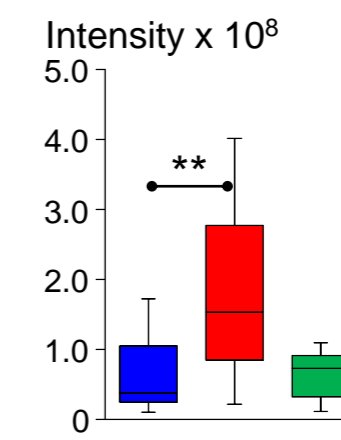

**Docosadienoic acid  
(C22:2)**

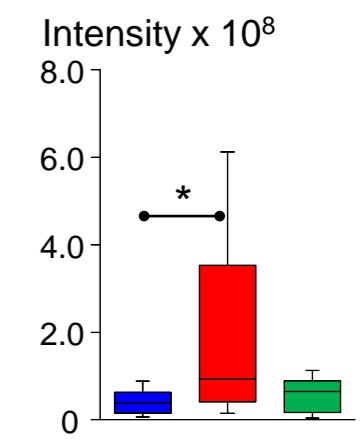

**Docosenoic acid  
(C22:1)**

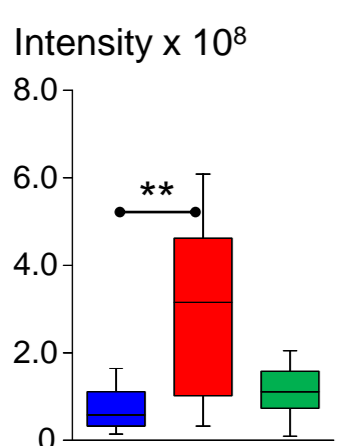

**Tricosenoic acid  
(C23:1)**

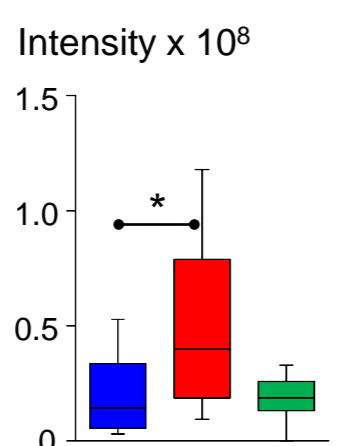

**Tetracosenoic acid  
(C24:1)**

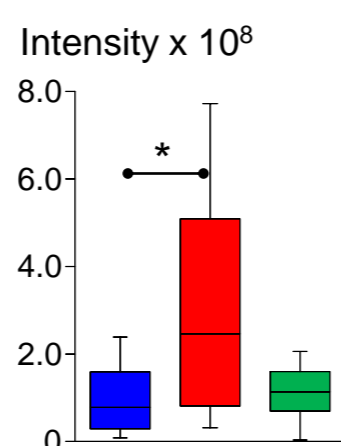

**Pentacosatrienoic acid  
(C25:3)**

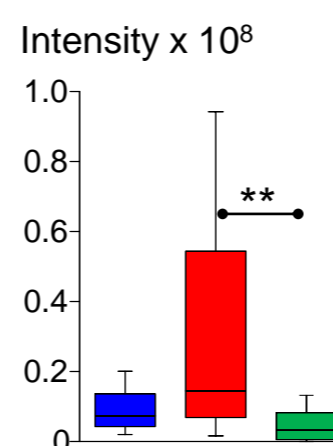

**Hexacosatrienoic acid  
(C26:3)**

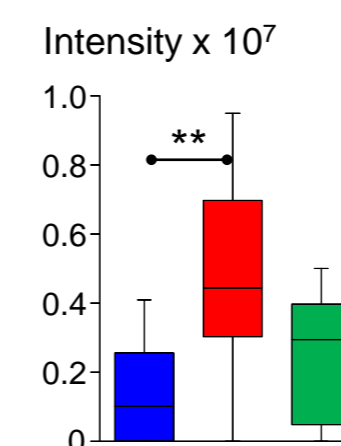

**Hexacosadienoic acid  
(C26:2)**

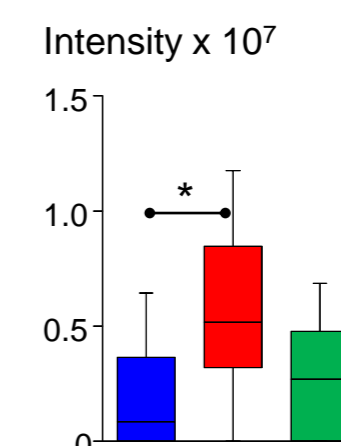

**Nonacosatrienoic acid  
(C29:3)**

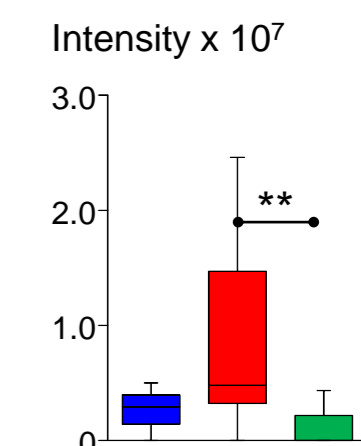

Supplement: mbo001173530sf5.pdf [file mbo001173530sf5.pdf]
