# Supplementary material for: Impact of Dietary Resistant Starch on the Human Gut Microbiome, Metaproteome, and Metabolome
Source: PubMed Central journal article supplement (PMC5646248; doi:10.1128/mbio.01343-17), 2017-10-17

**A**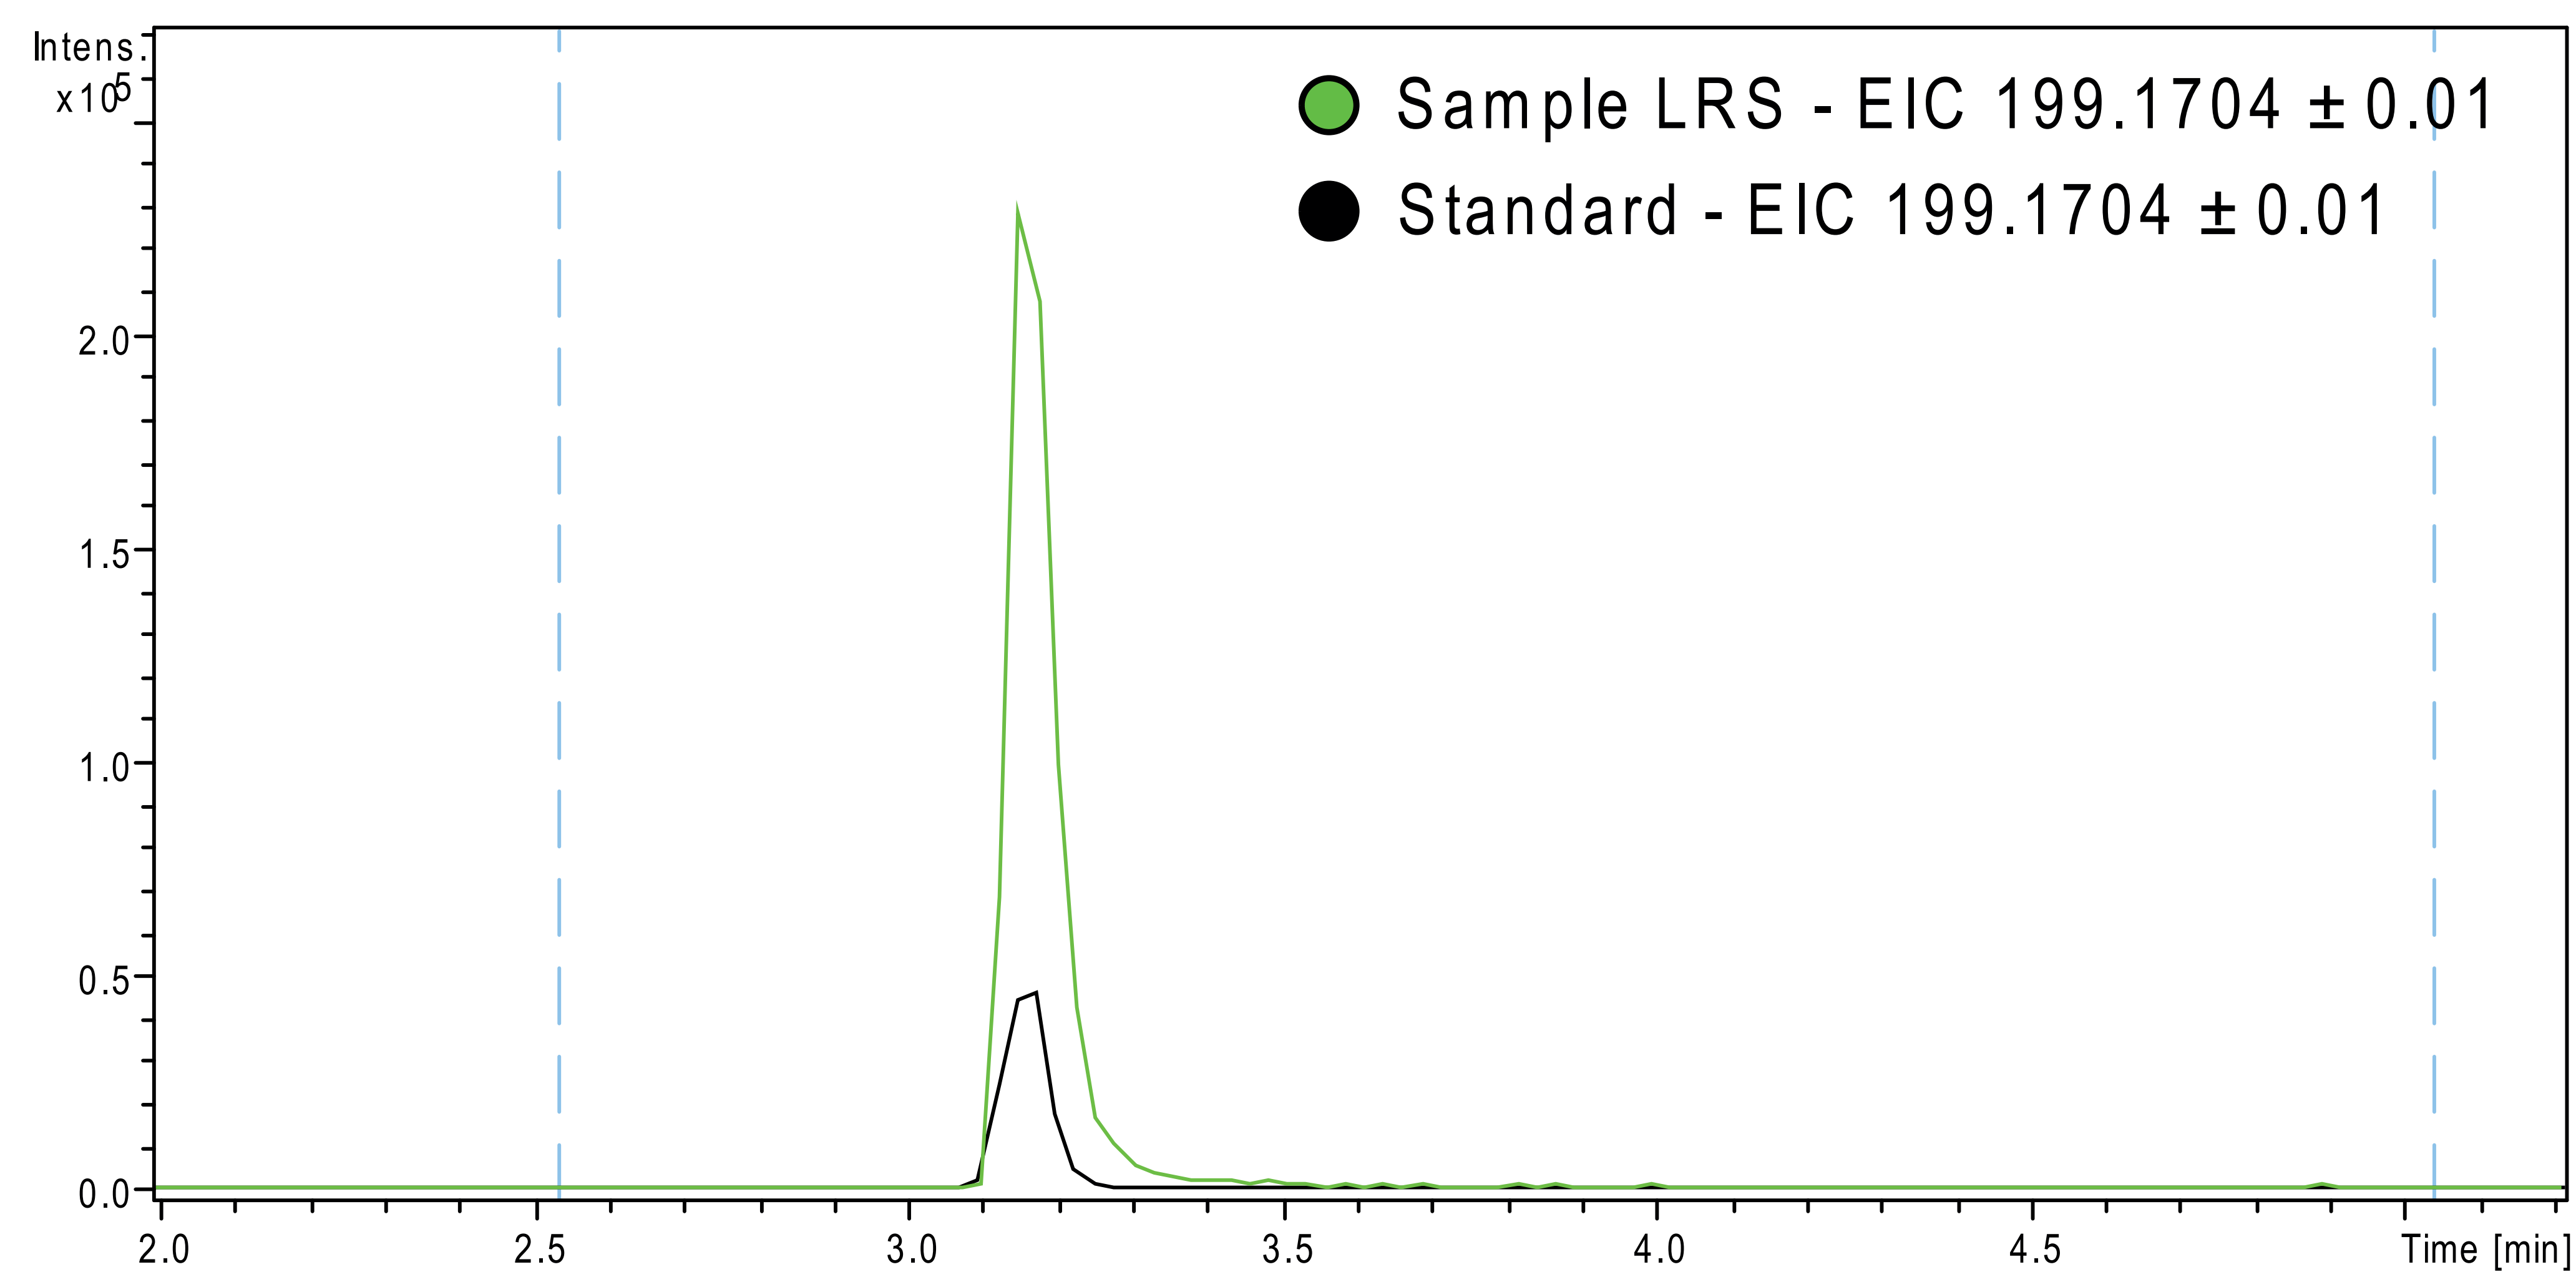**UPLC-QToF-MS**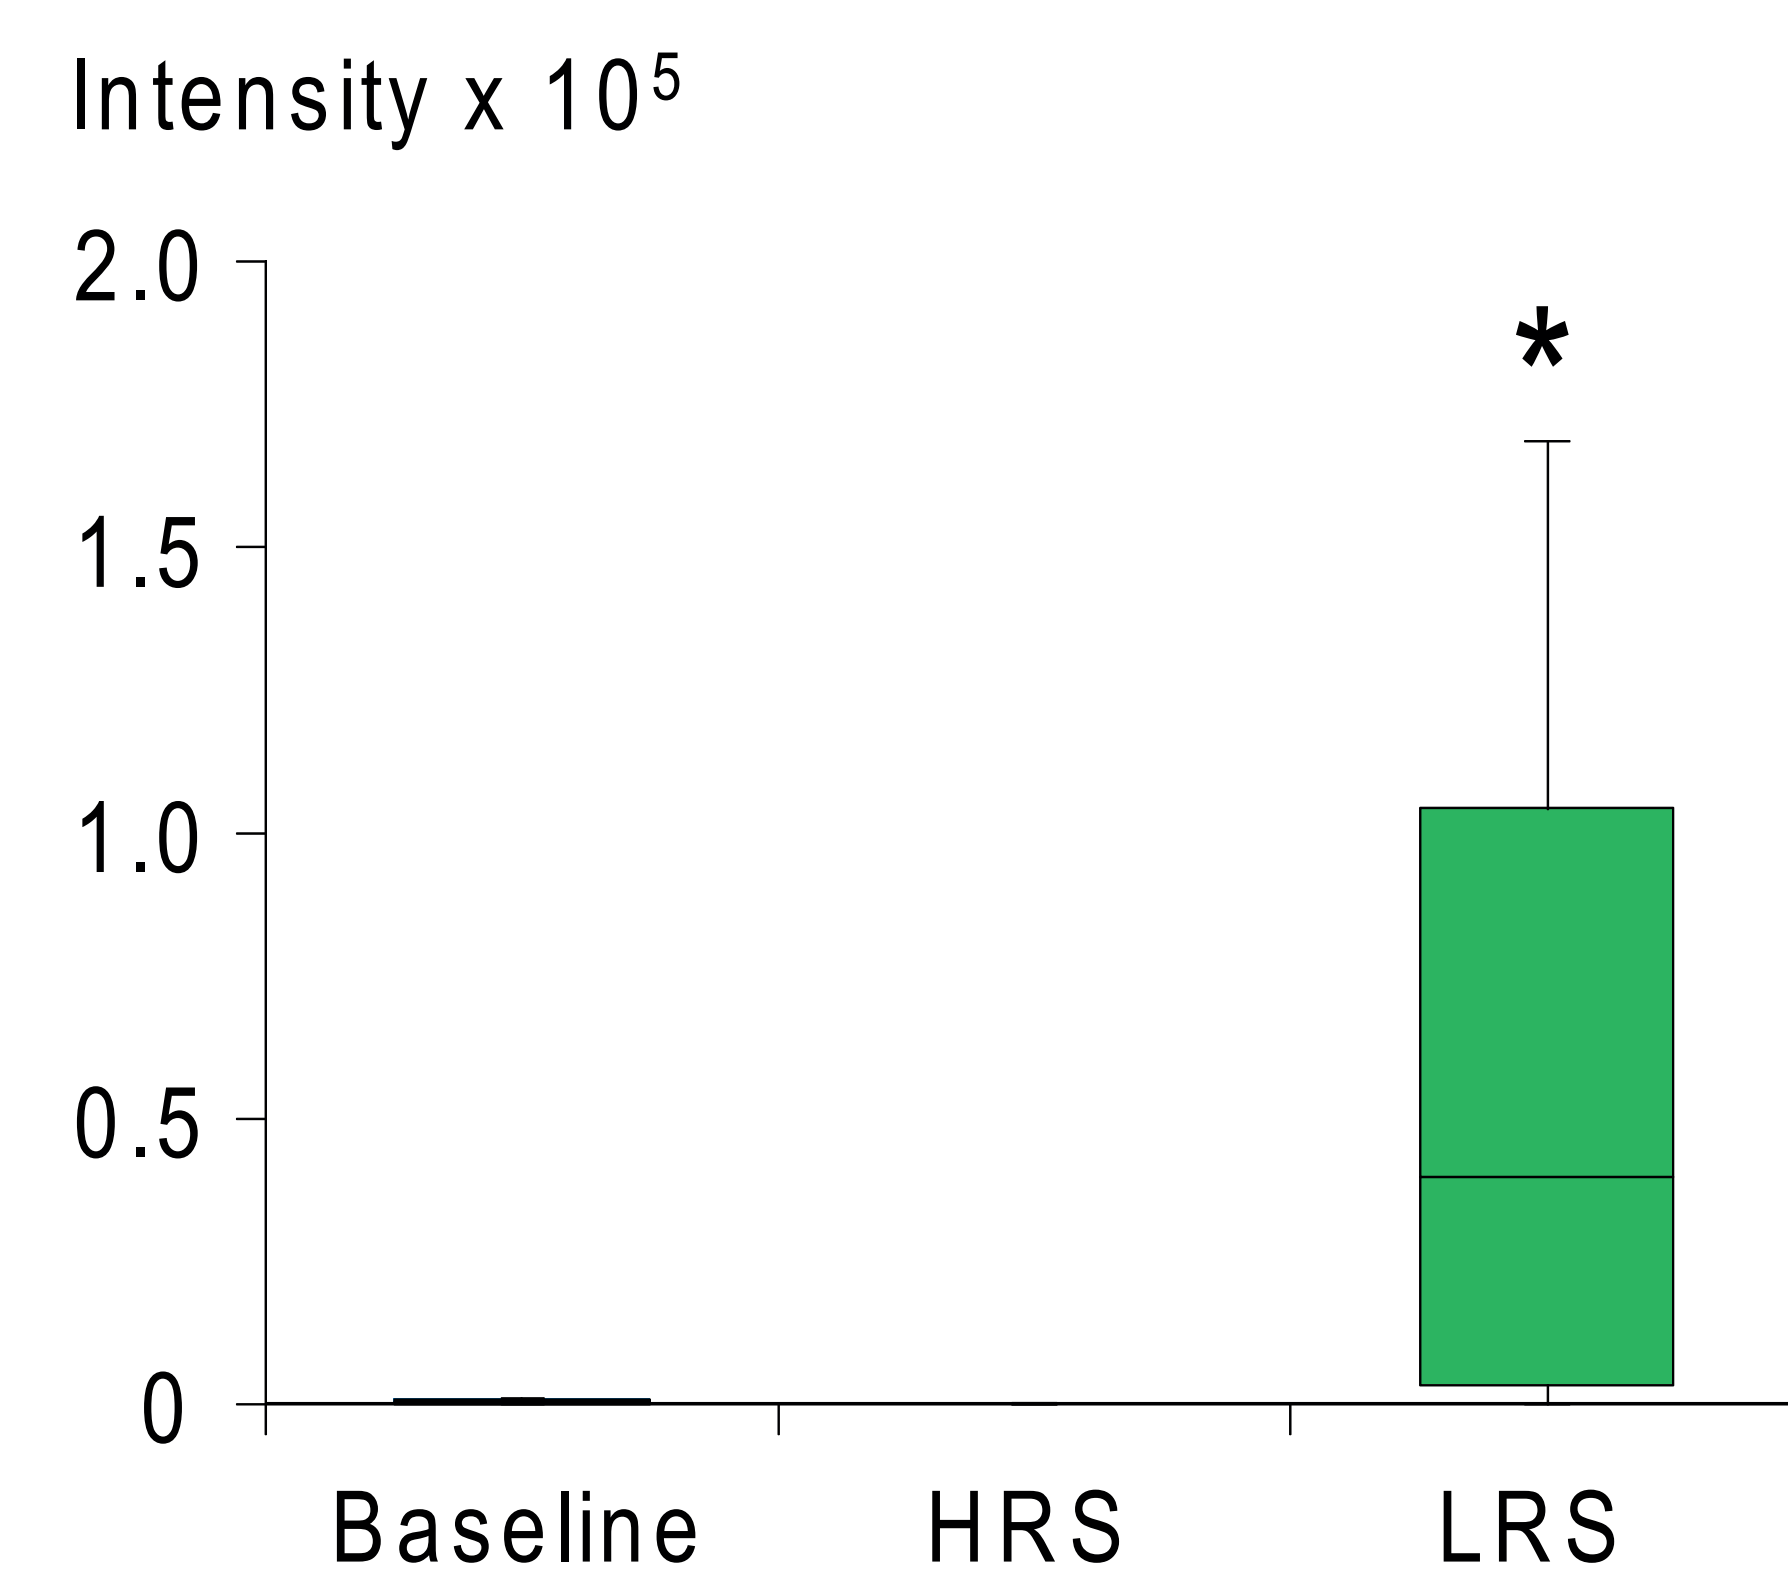**FT-ICR-MS**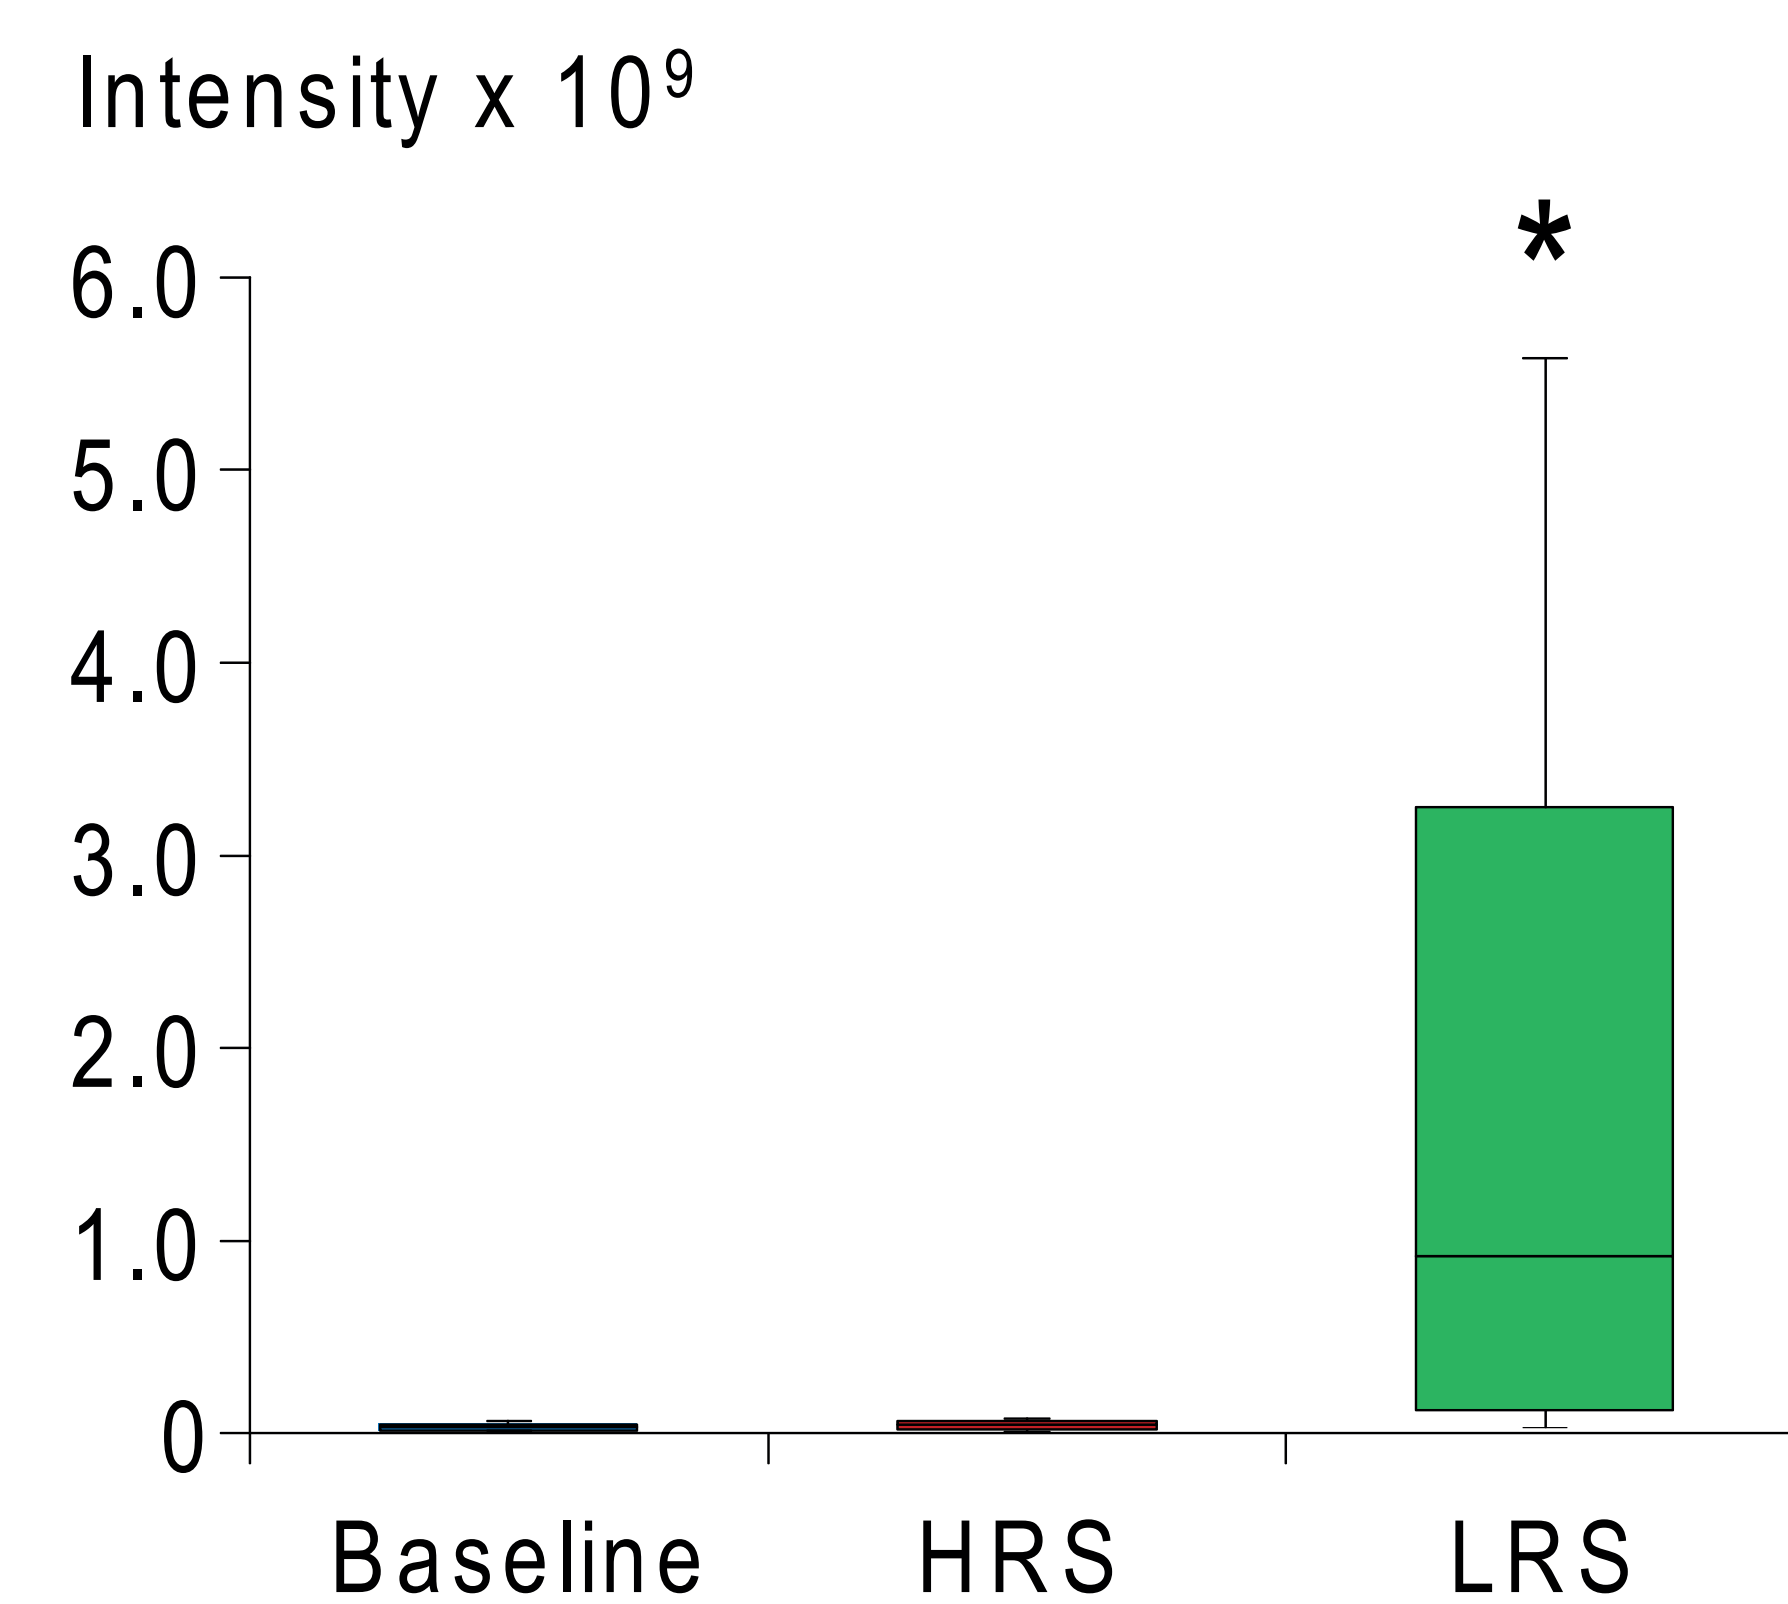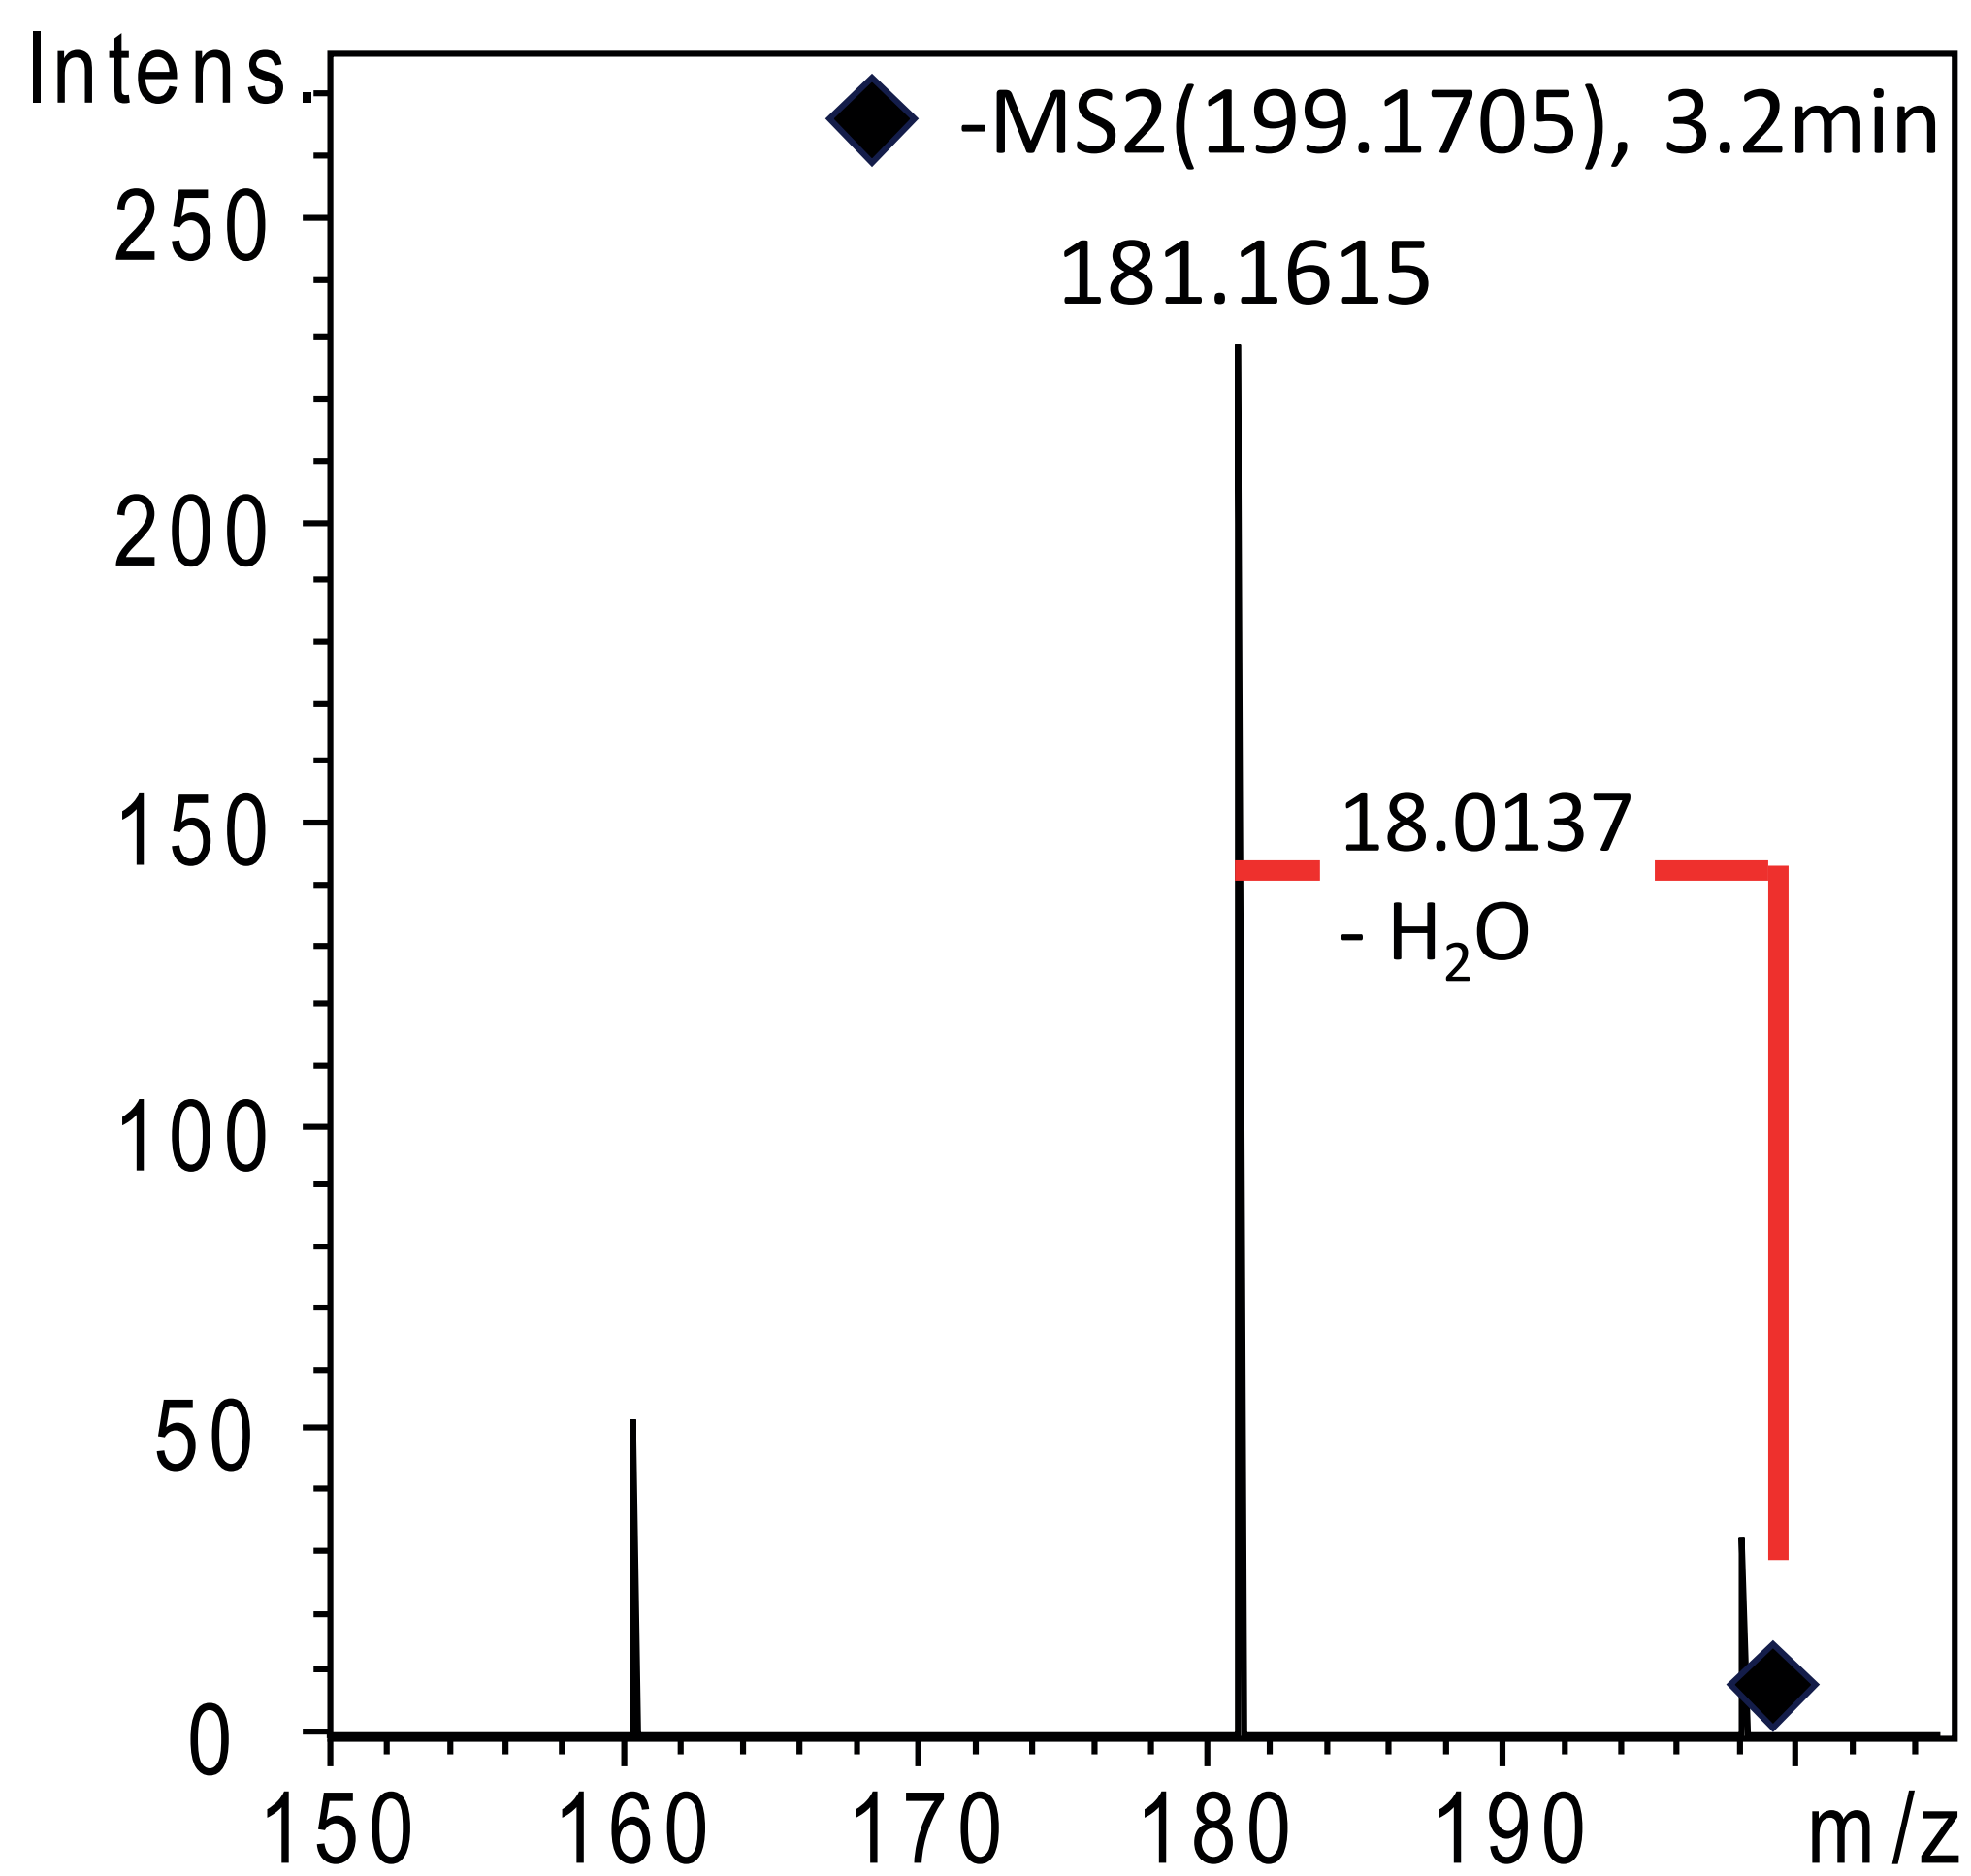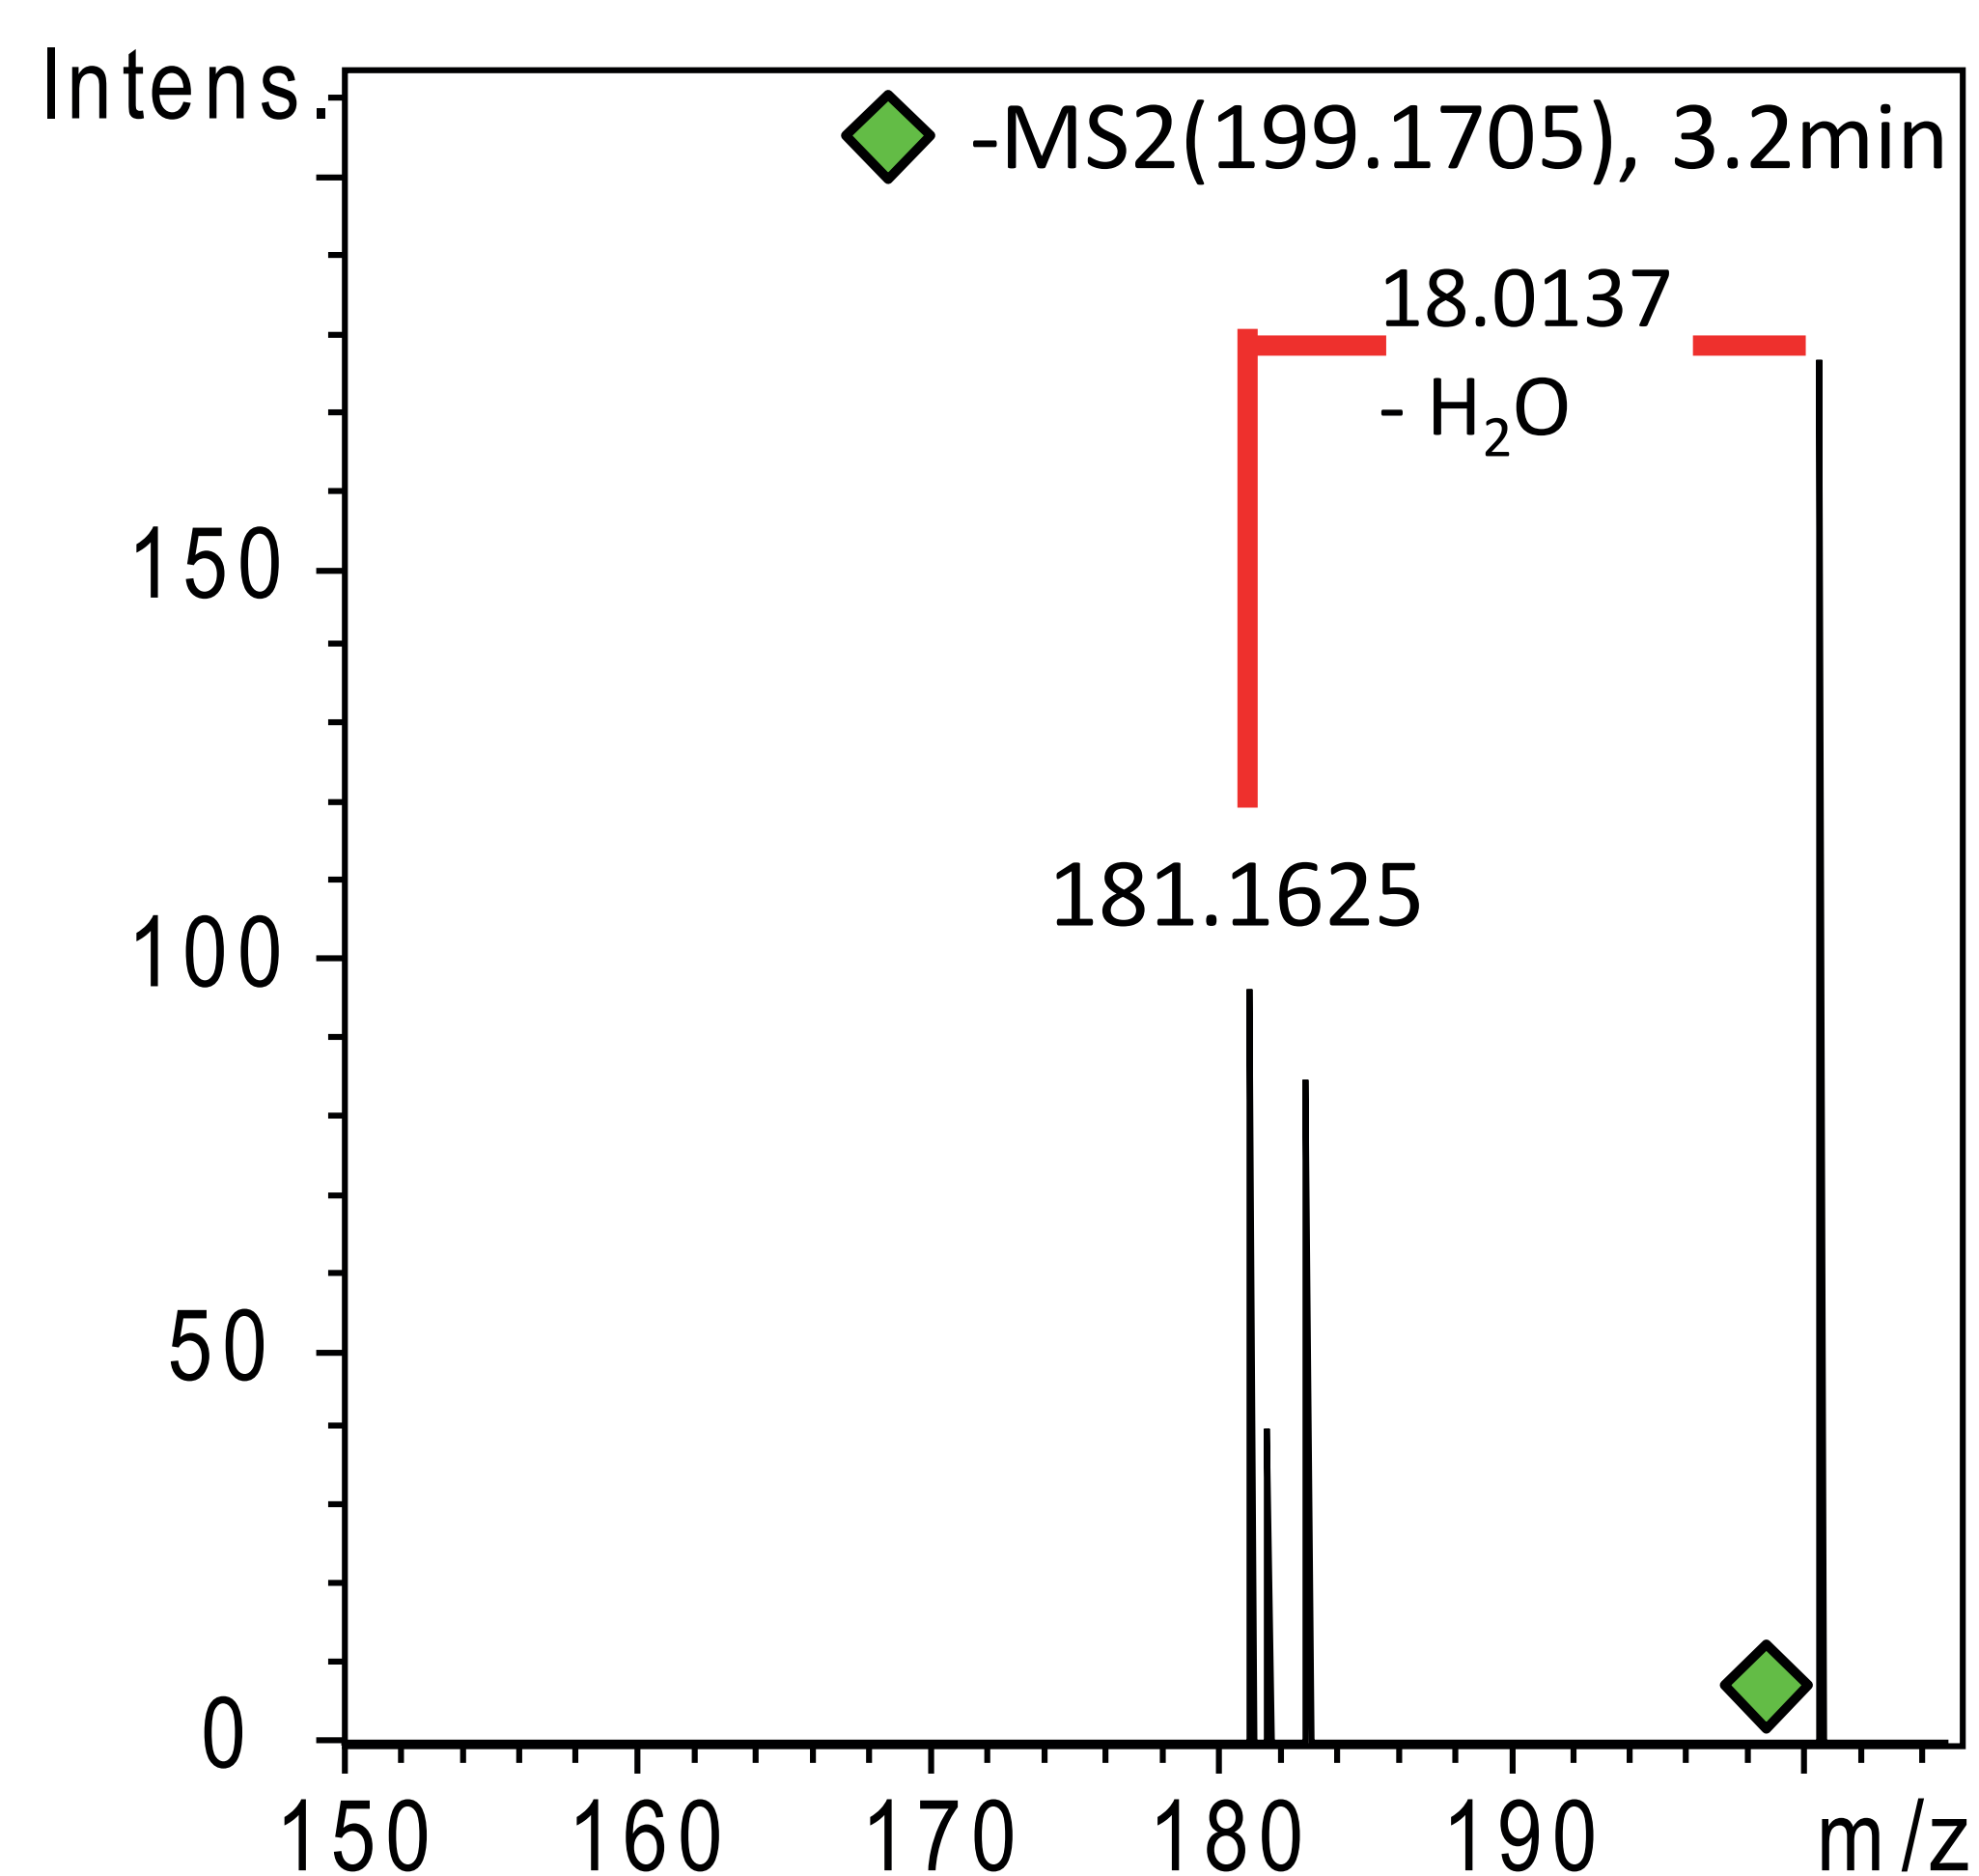**B**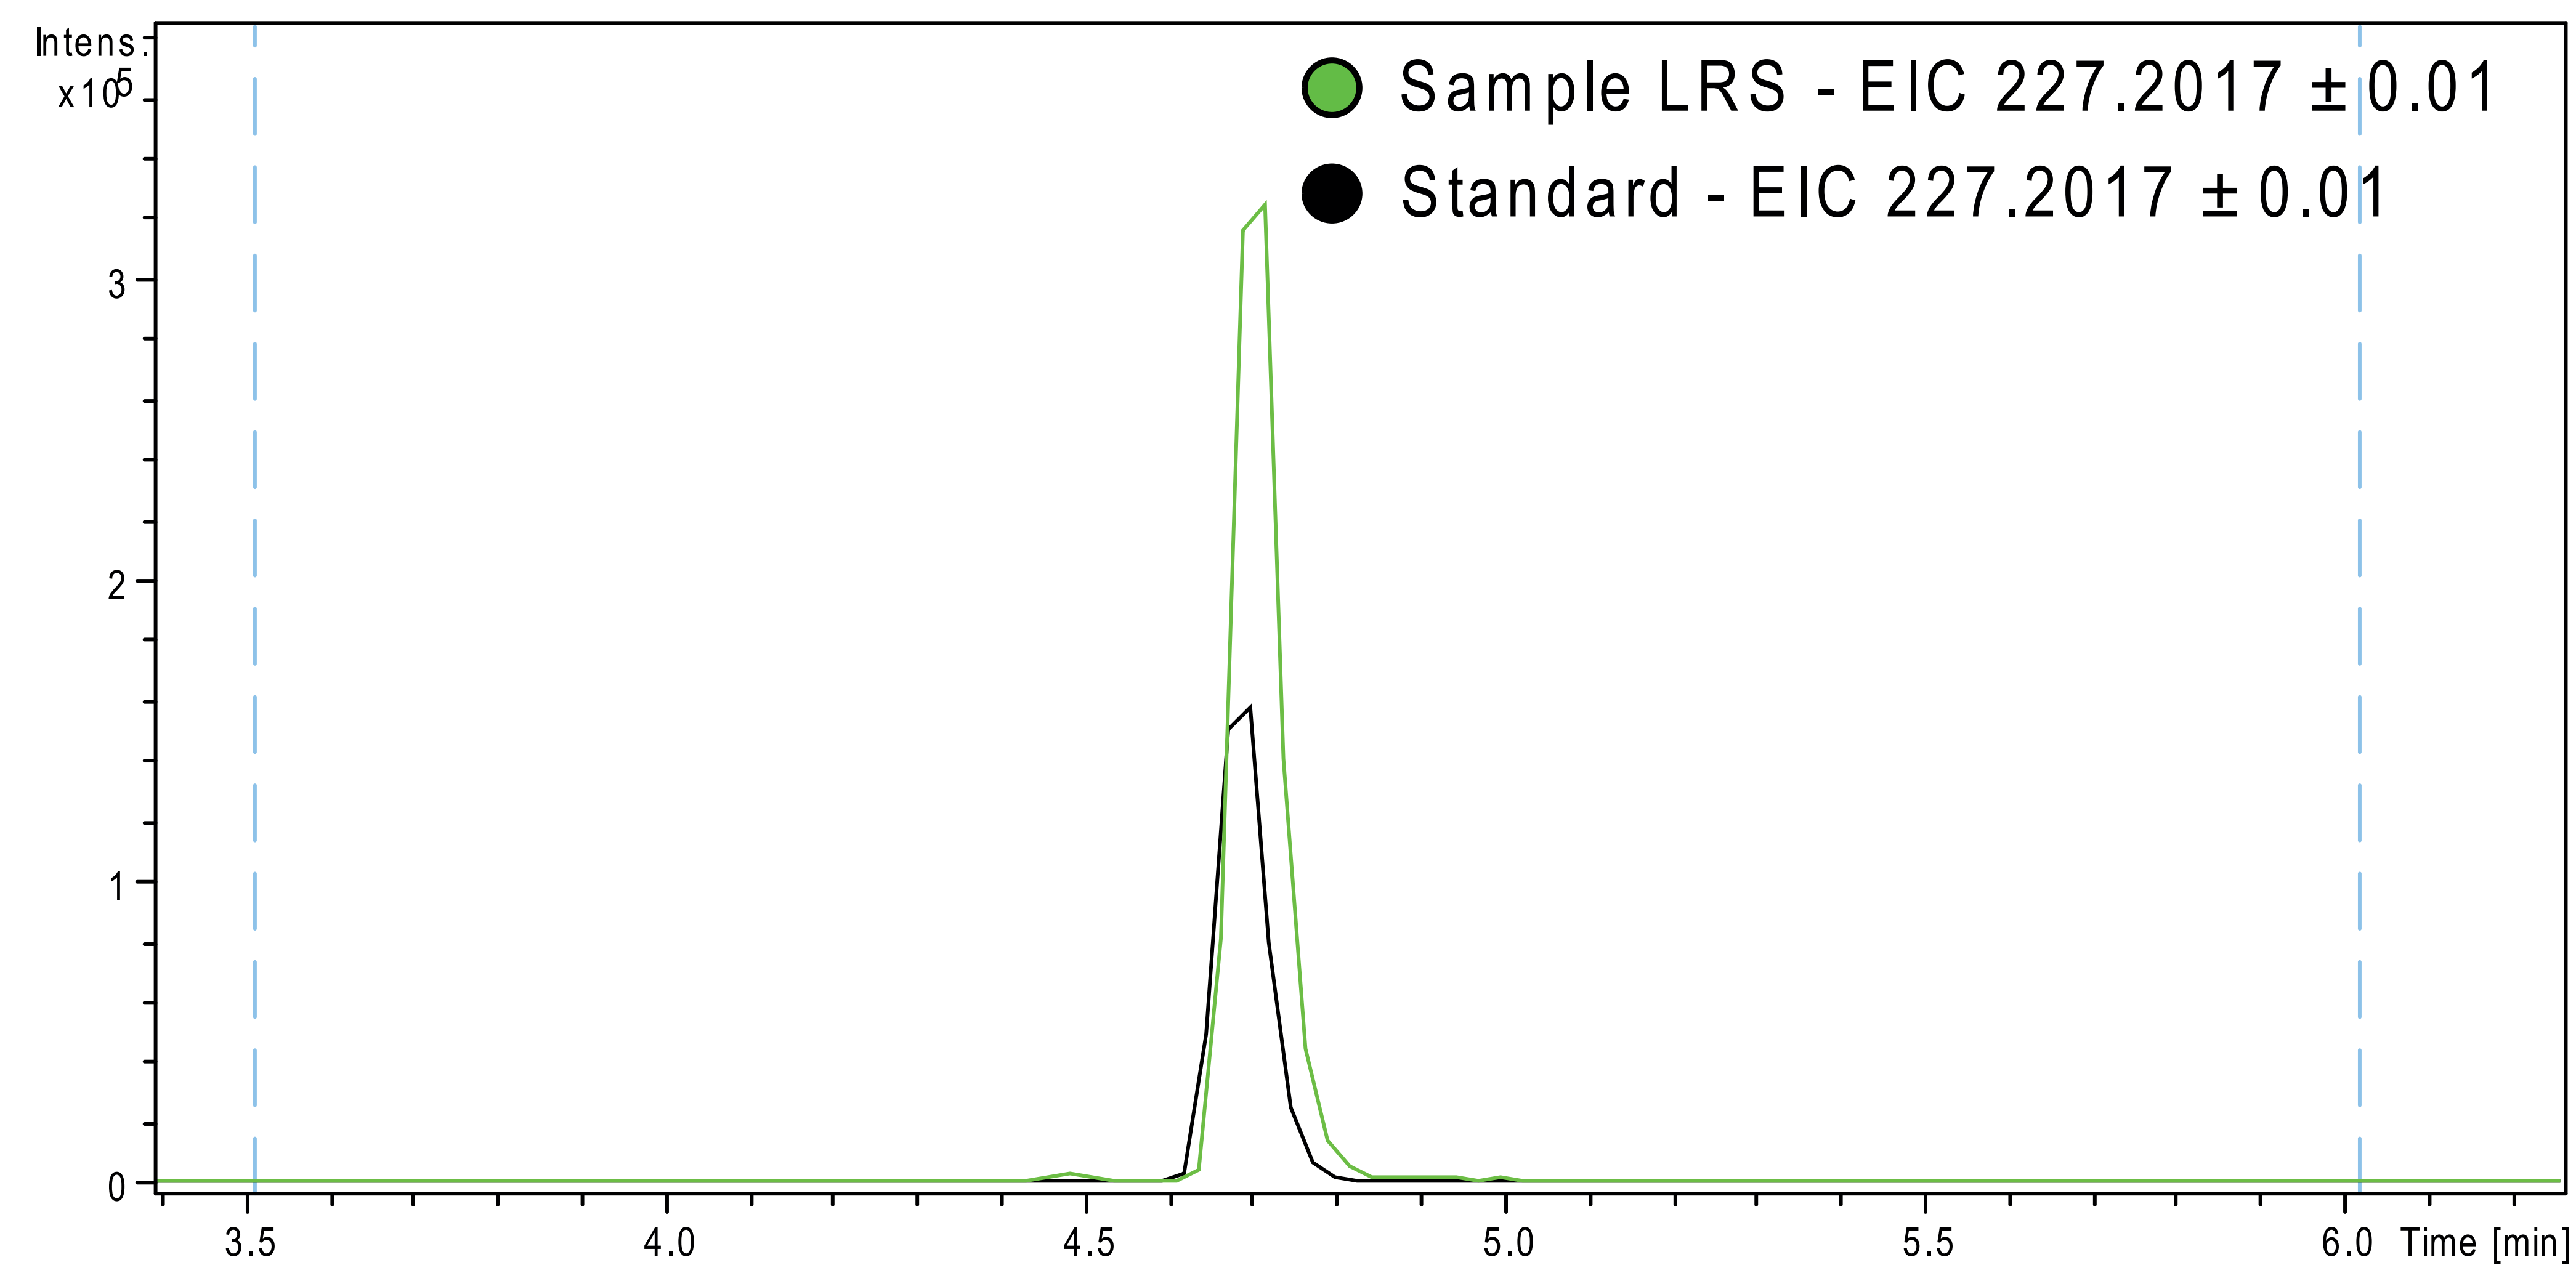**UPLC-QToF-MS**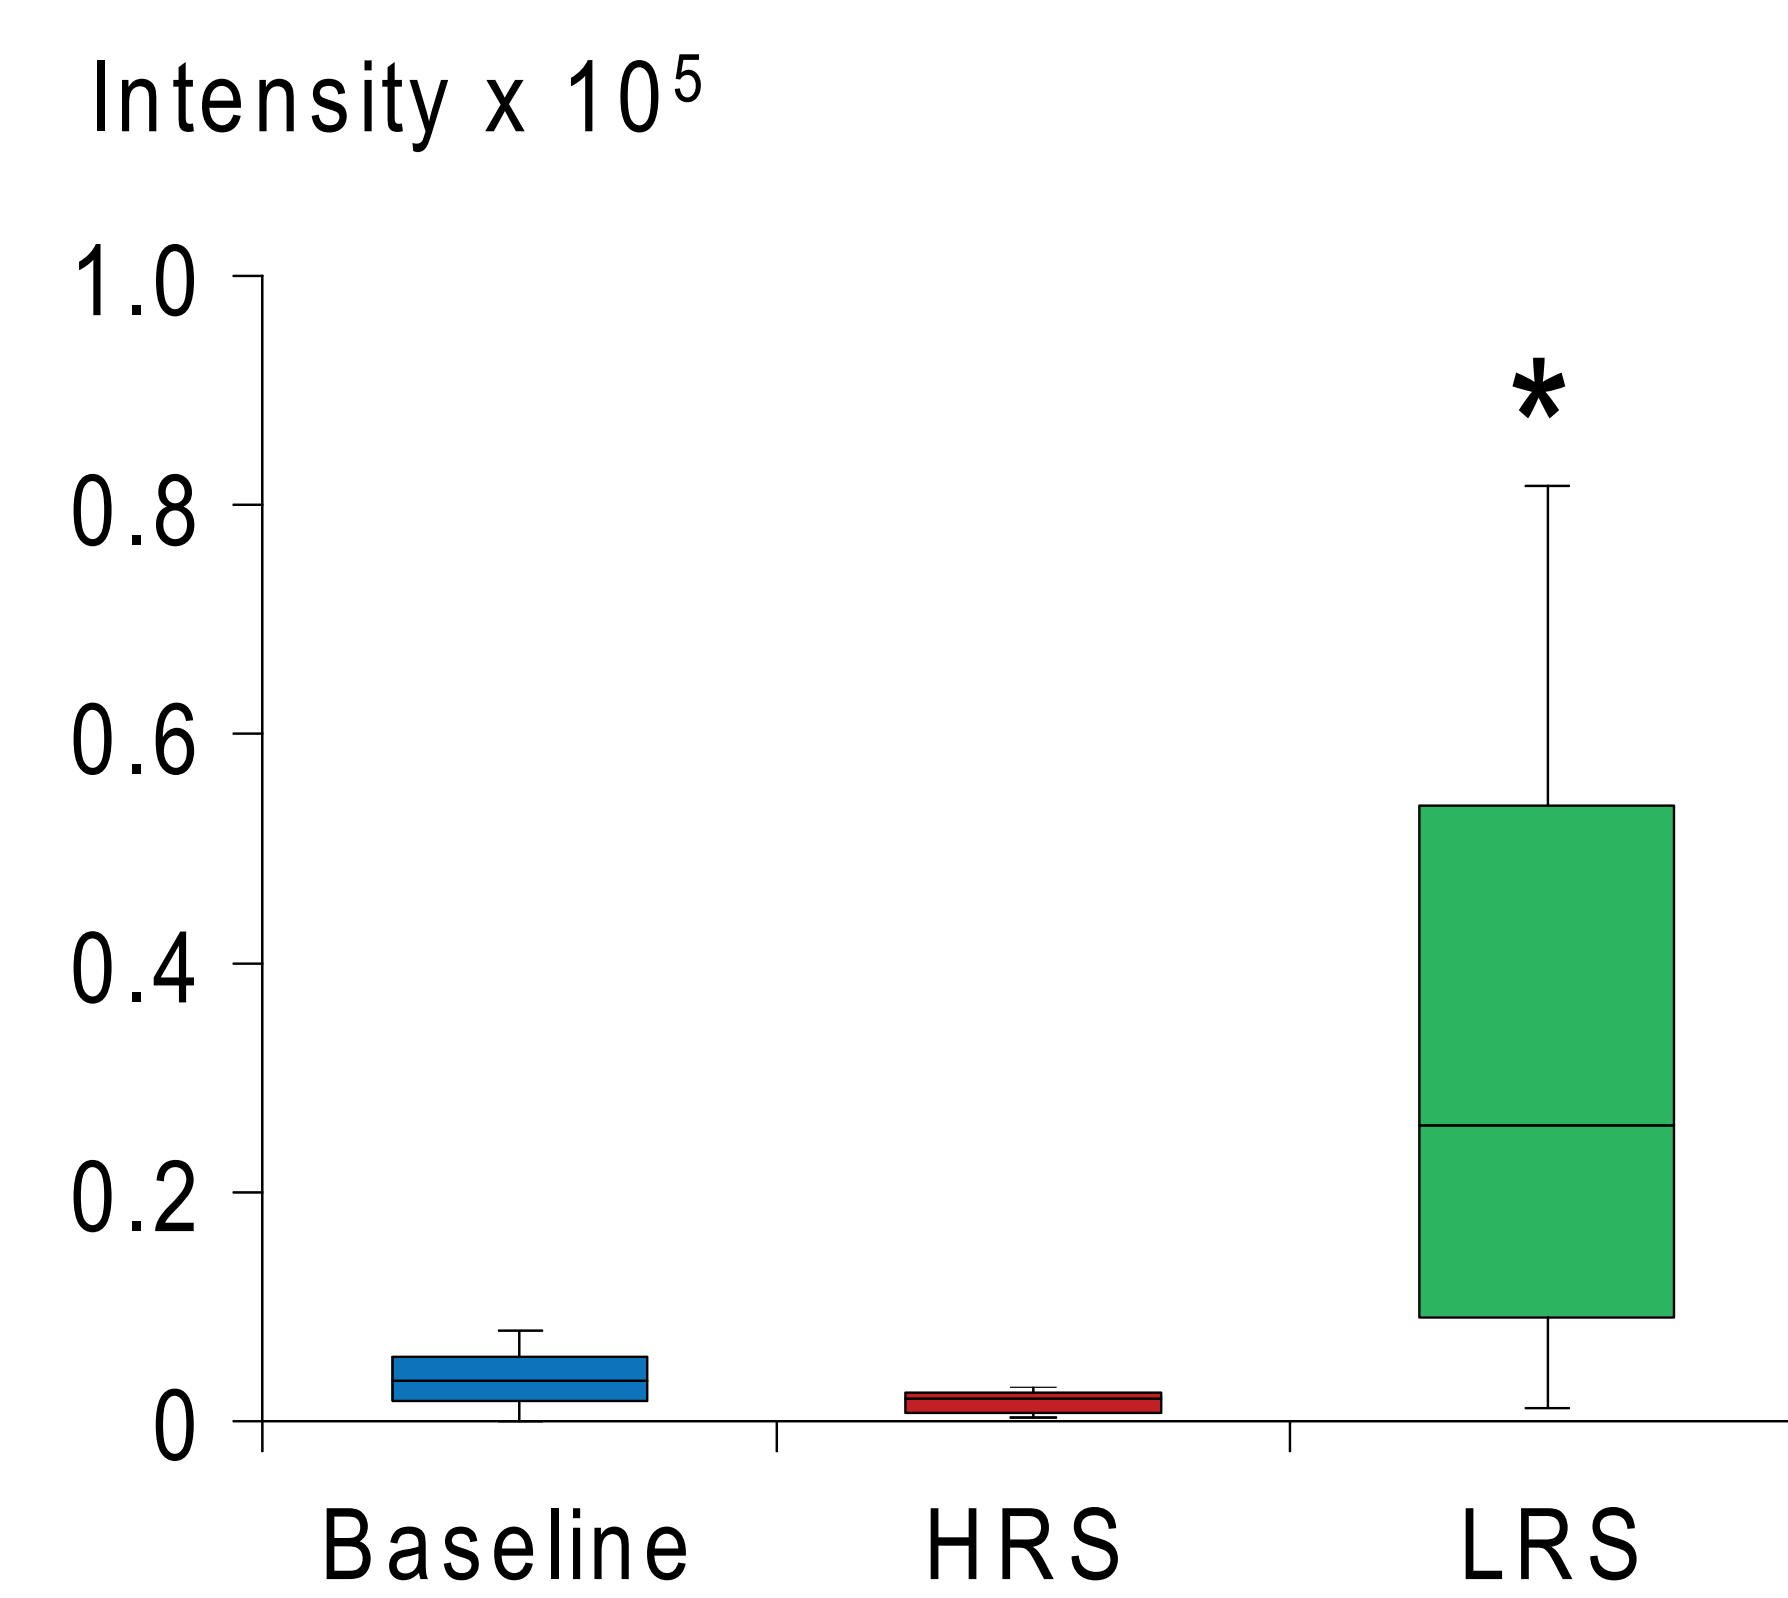**FT-ICR-MS**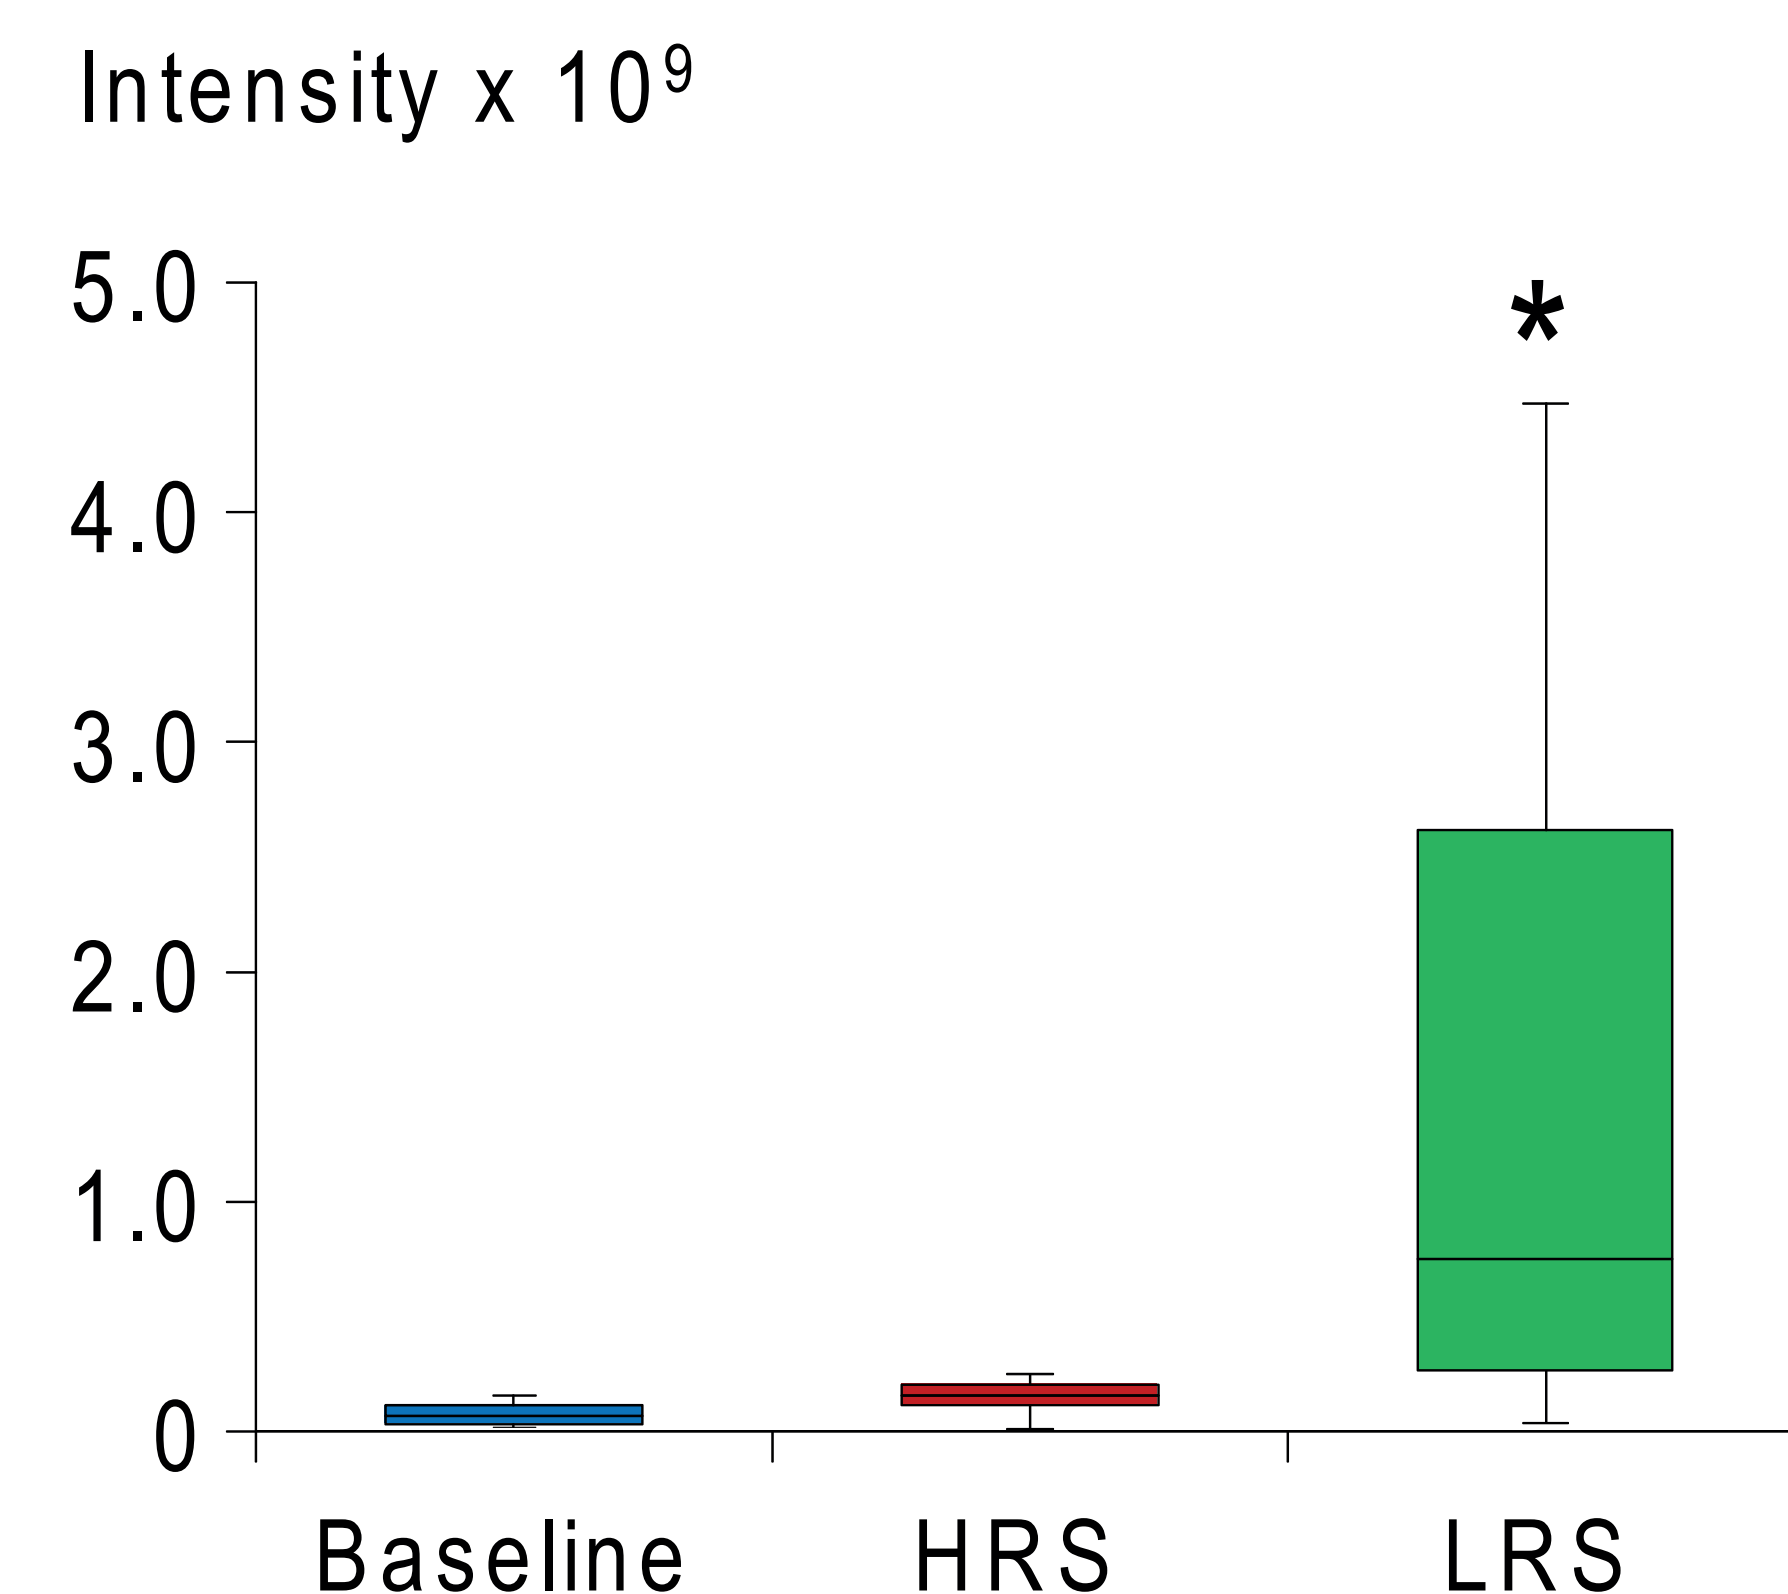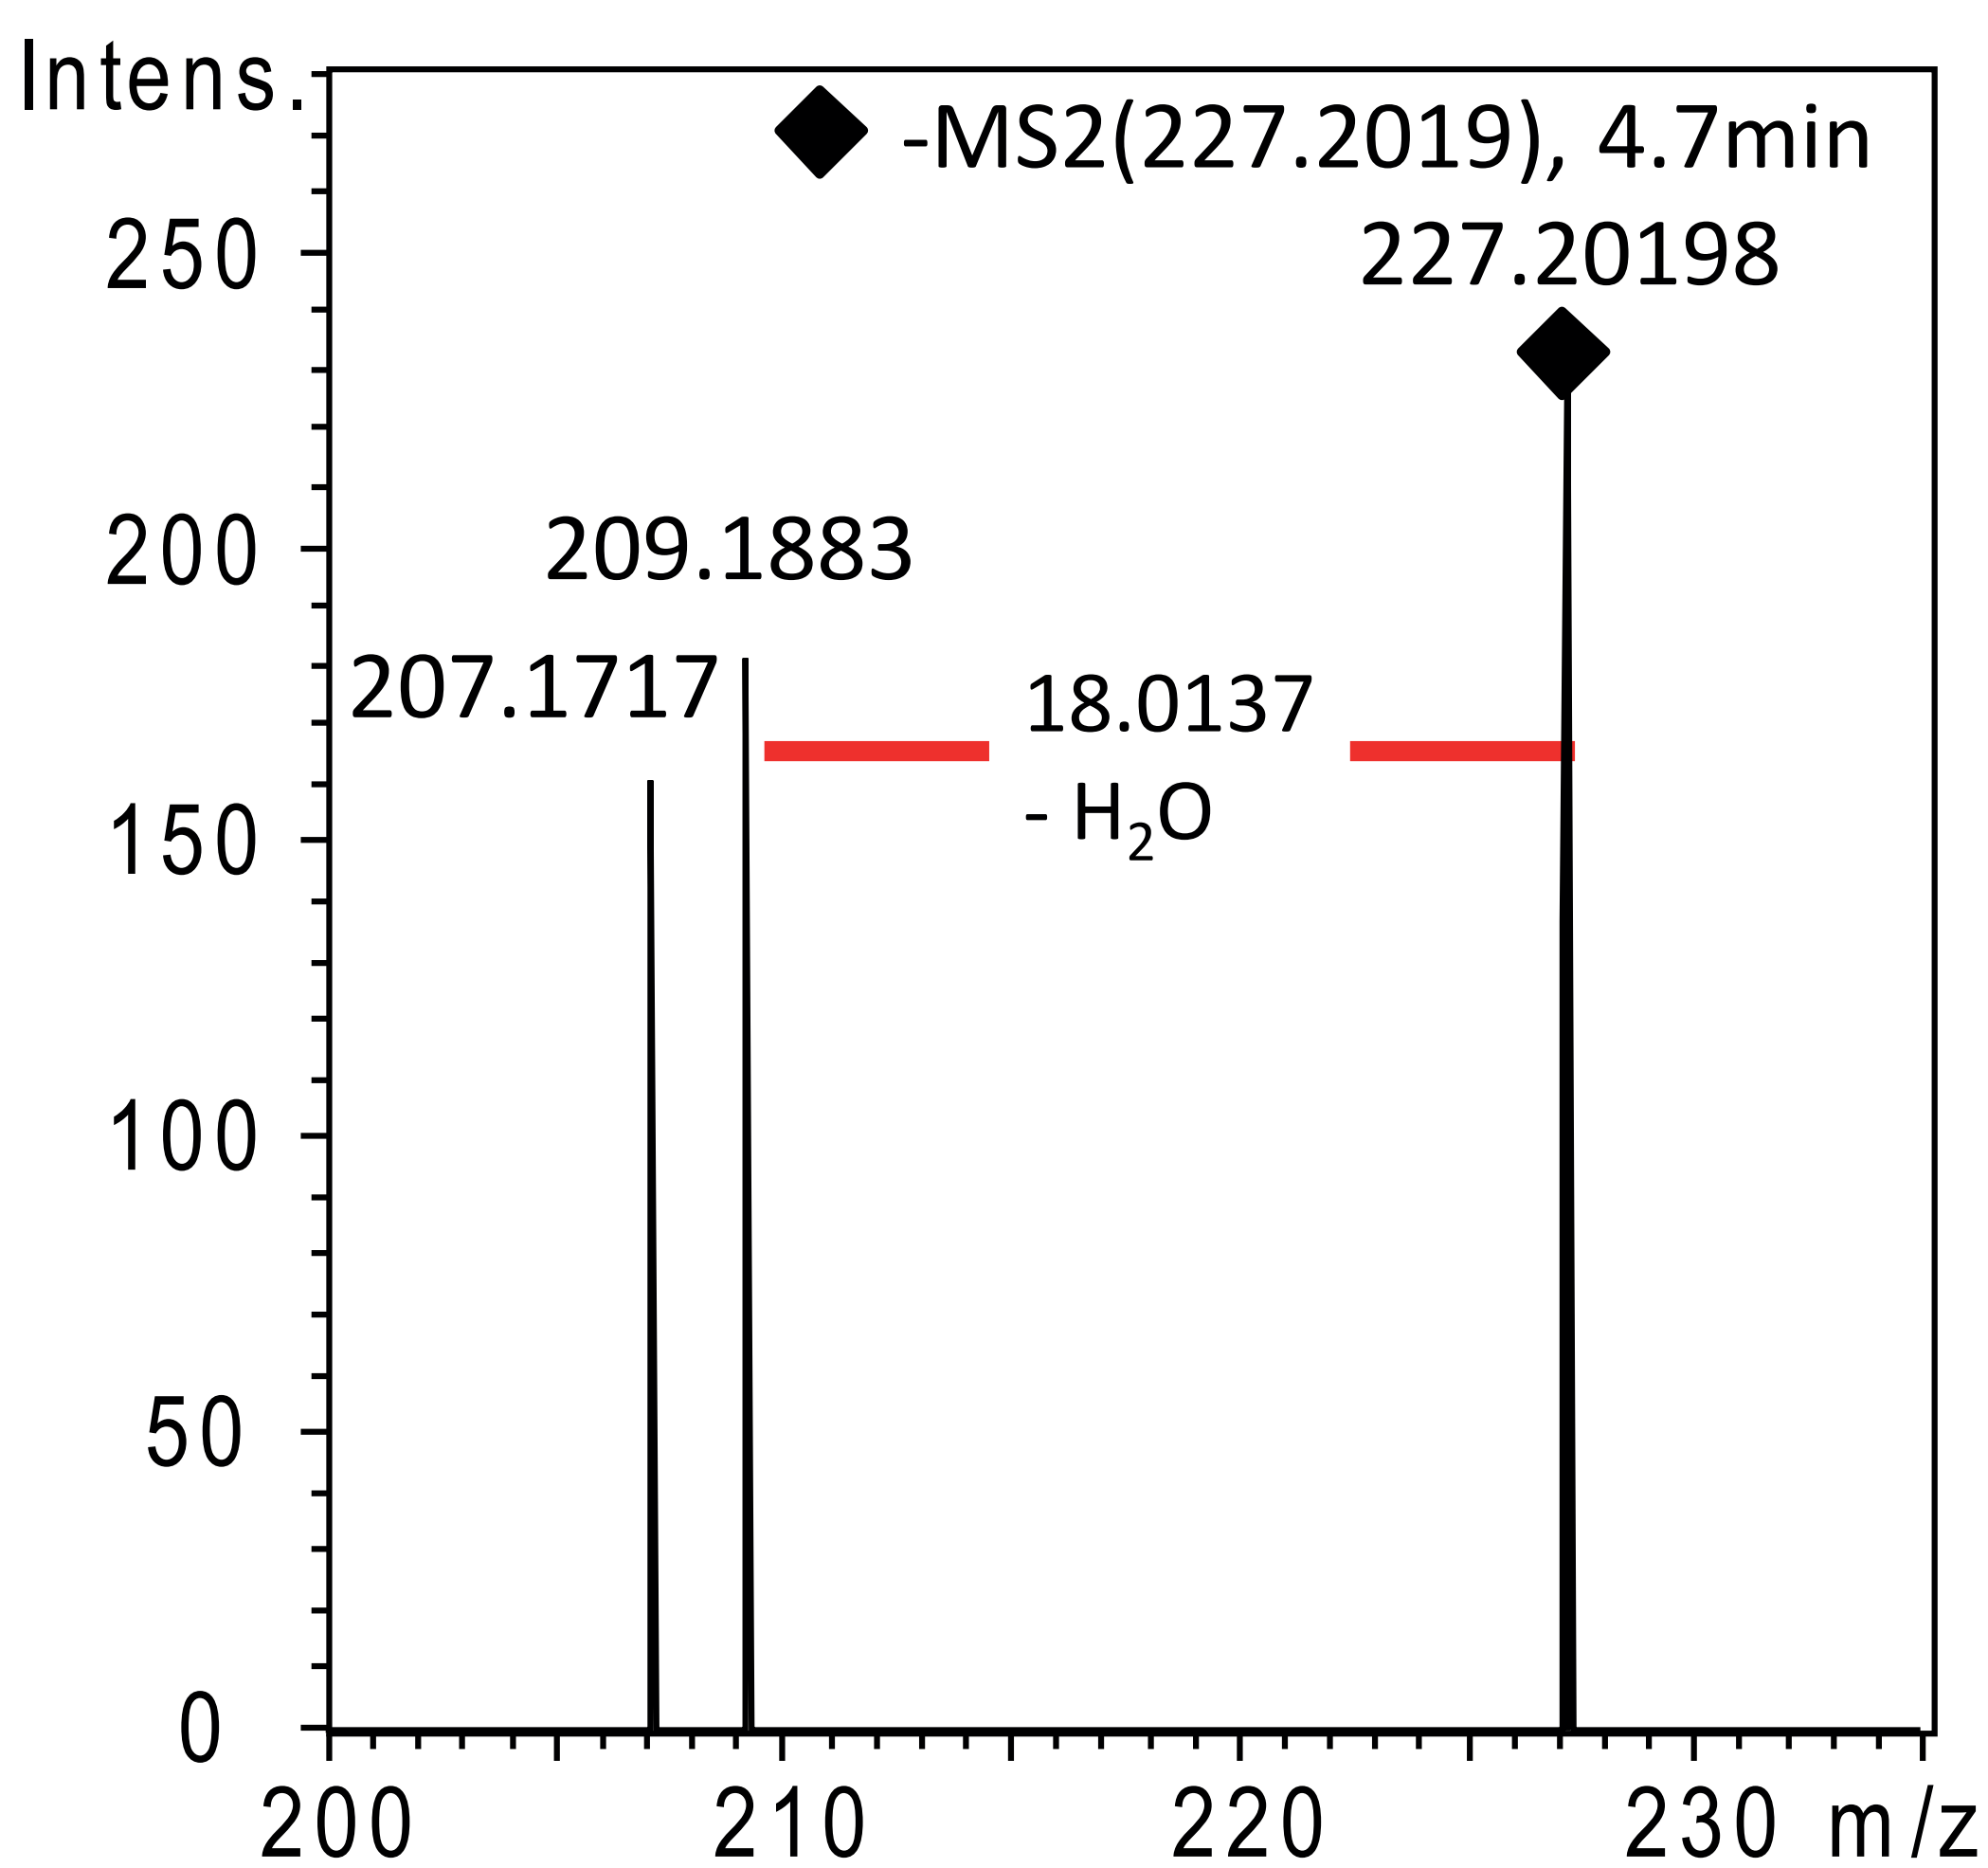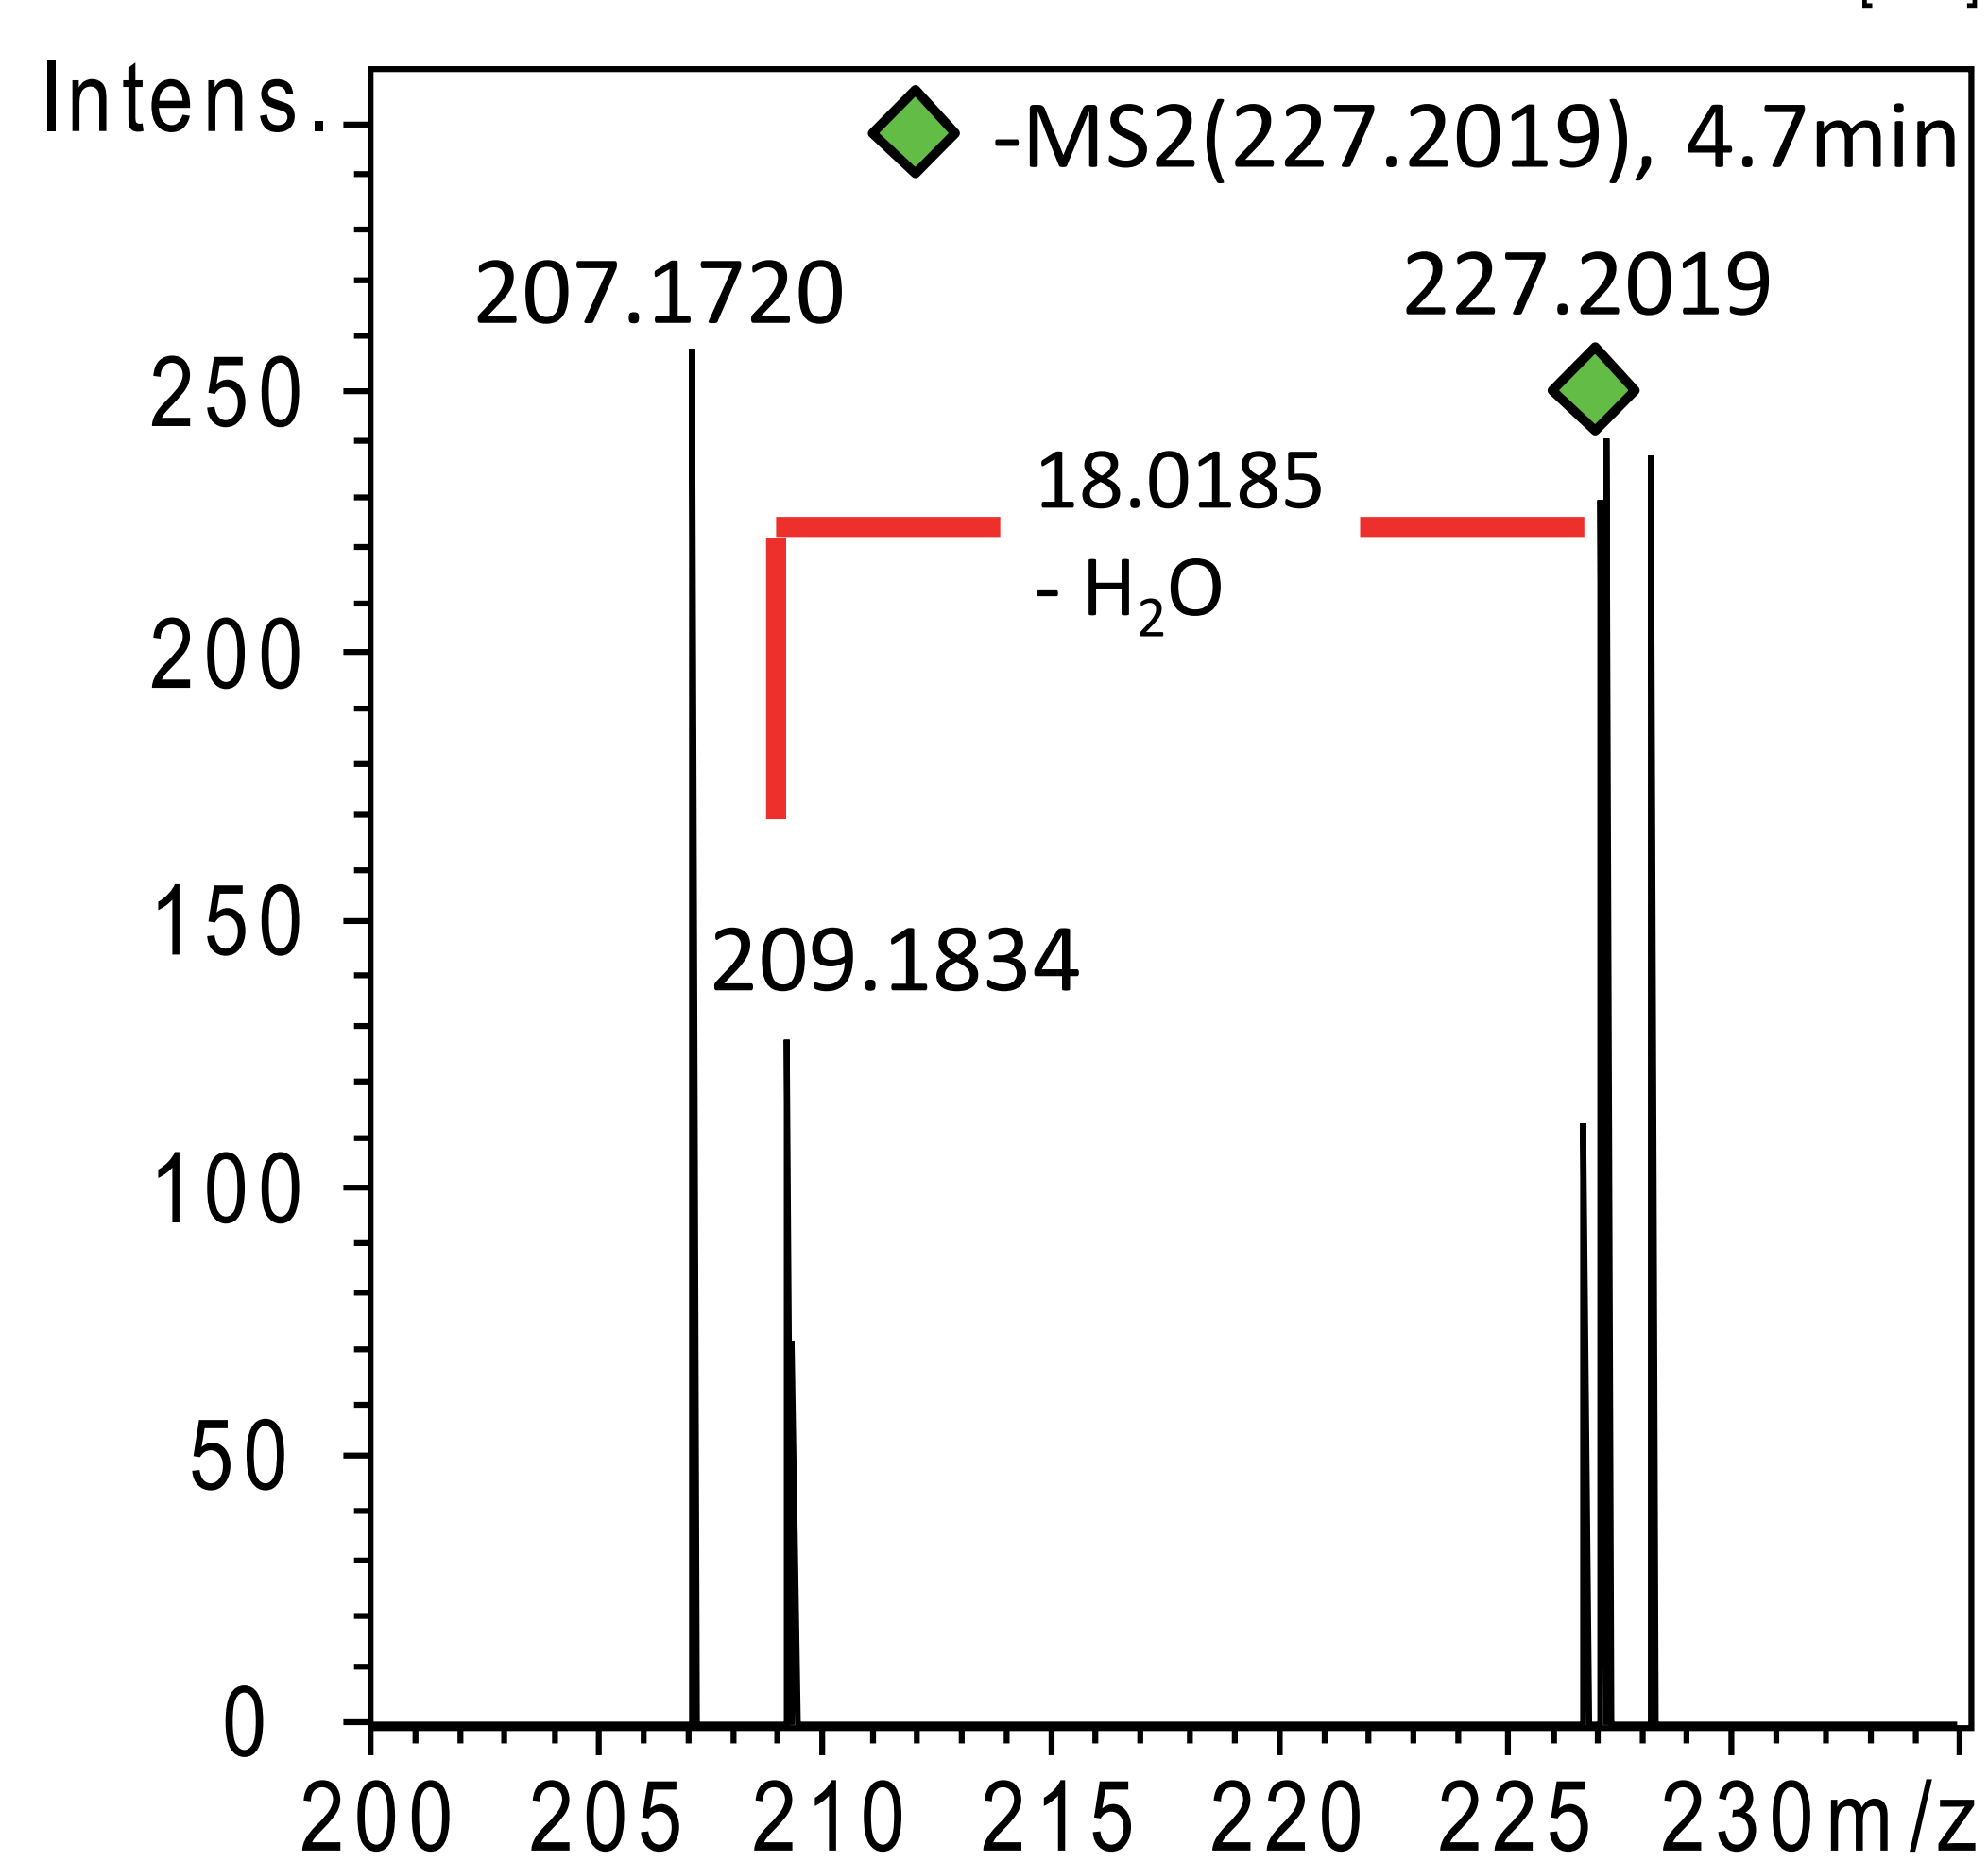

Supplement: mbo001173530sf6.pdf [file mbo001173530sf6.pdf]
