# Supplementary material for: Impact of Dietary Resistant Starch on the Human Gut Microbiome, Metaproteome, and Metabolome
Source: PubMed Central journal article supplement (PMC5646248; doi:10.1128/mbio.01343-17), 2017-10-17

PC 2 (10.17%)

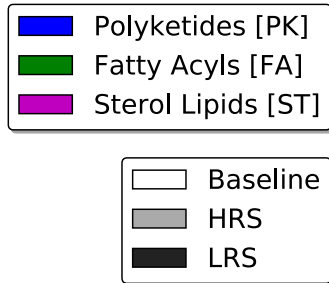

PC 1 (12.71%)

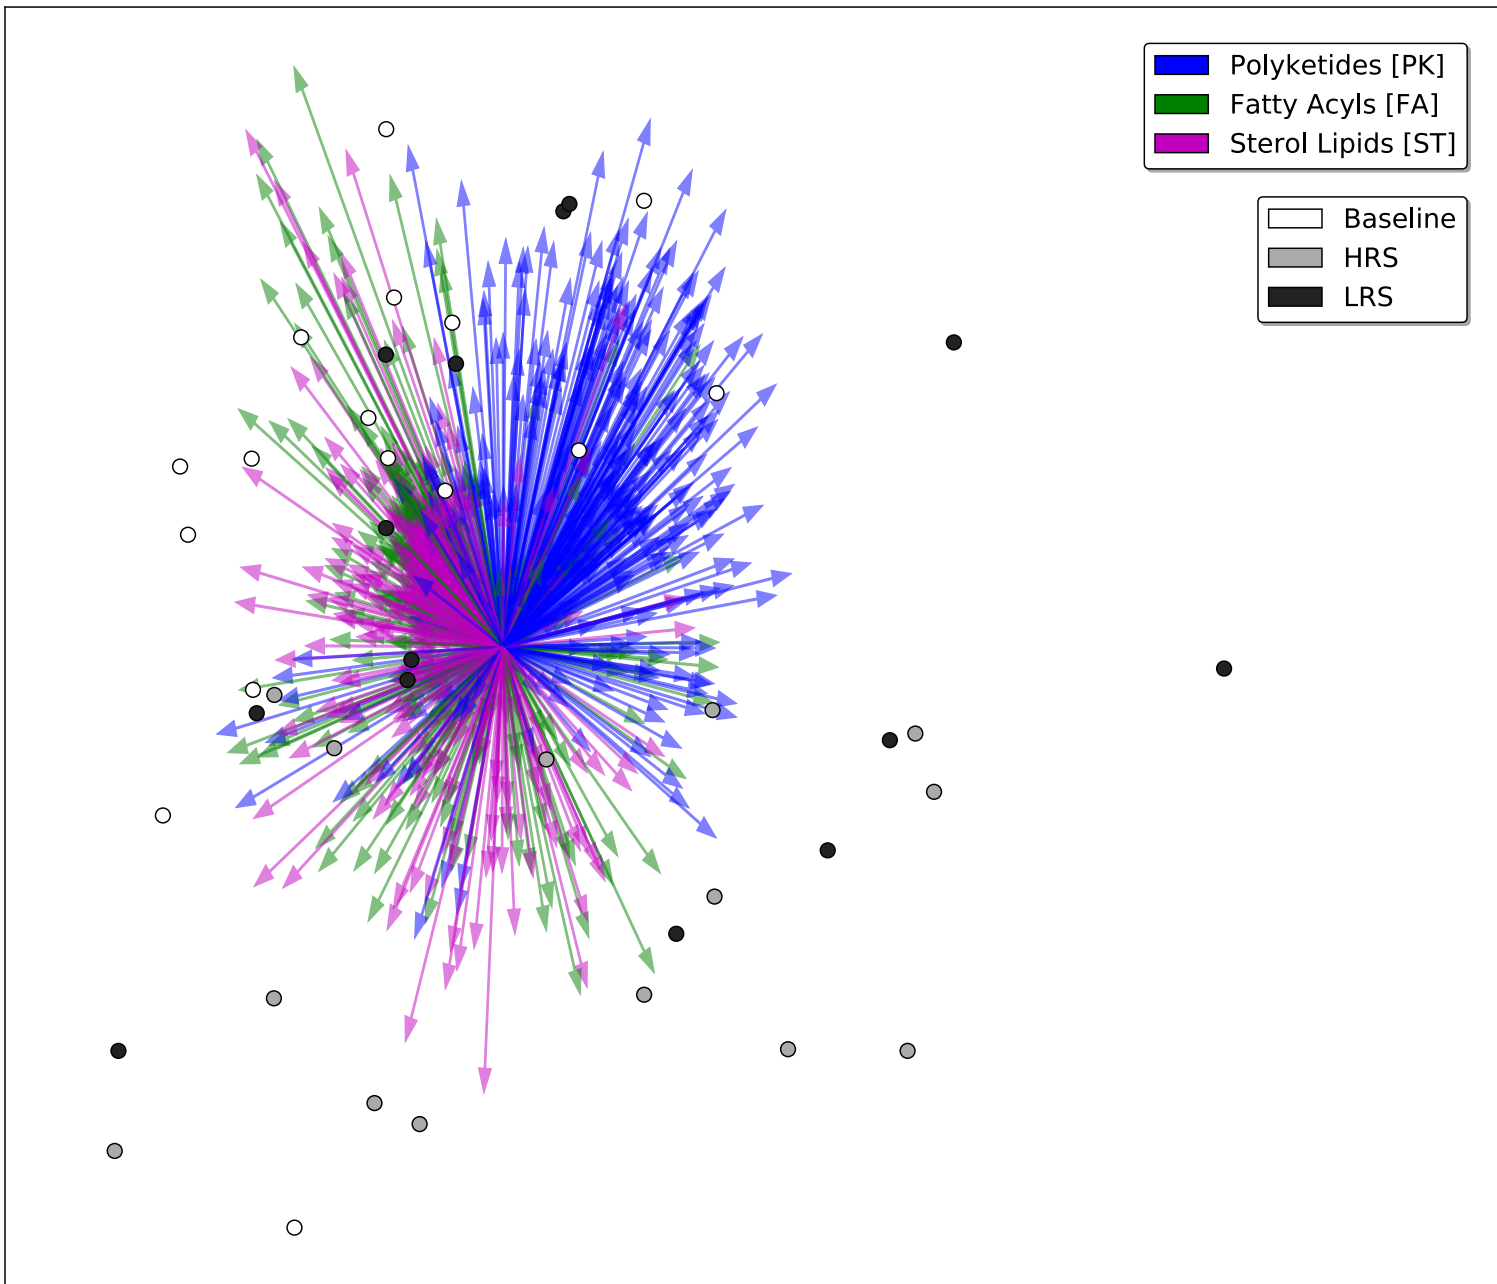

Supplement: mbo001173530sf7.pdf [file mbo001173530sf7.pdf]
