# Supplementary material for: Impact of Dietary Resistant Starch on the Human Gut Microbiome, Metaproteome, and Metabolome
Source: PubMed Central journal article supplement (PMC5646248; doi:10.1128/mbio.01343-17), 2017-10-17

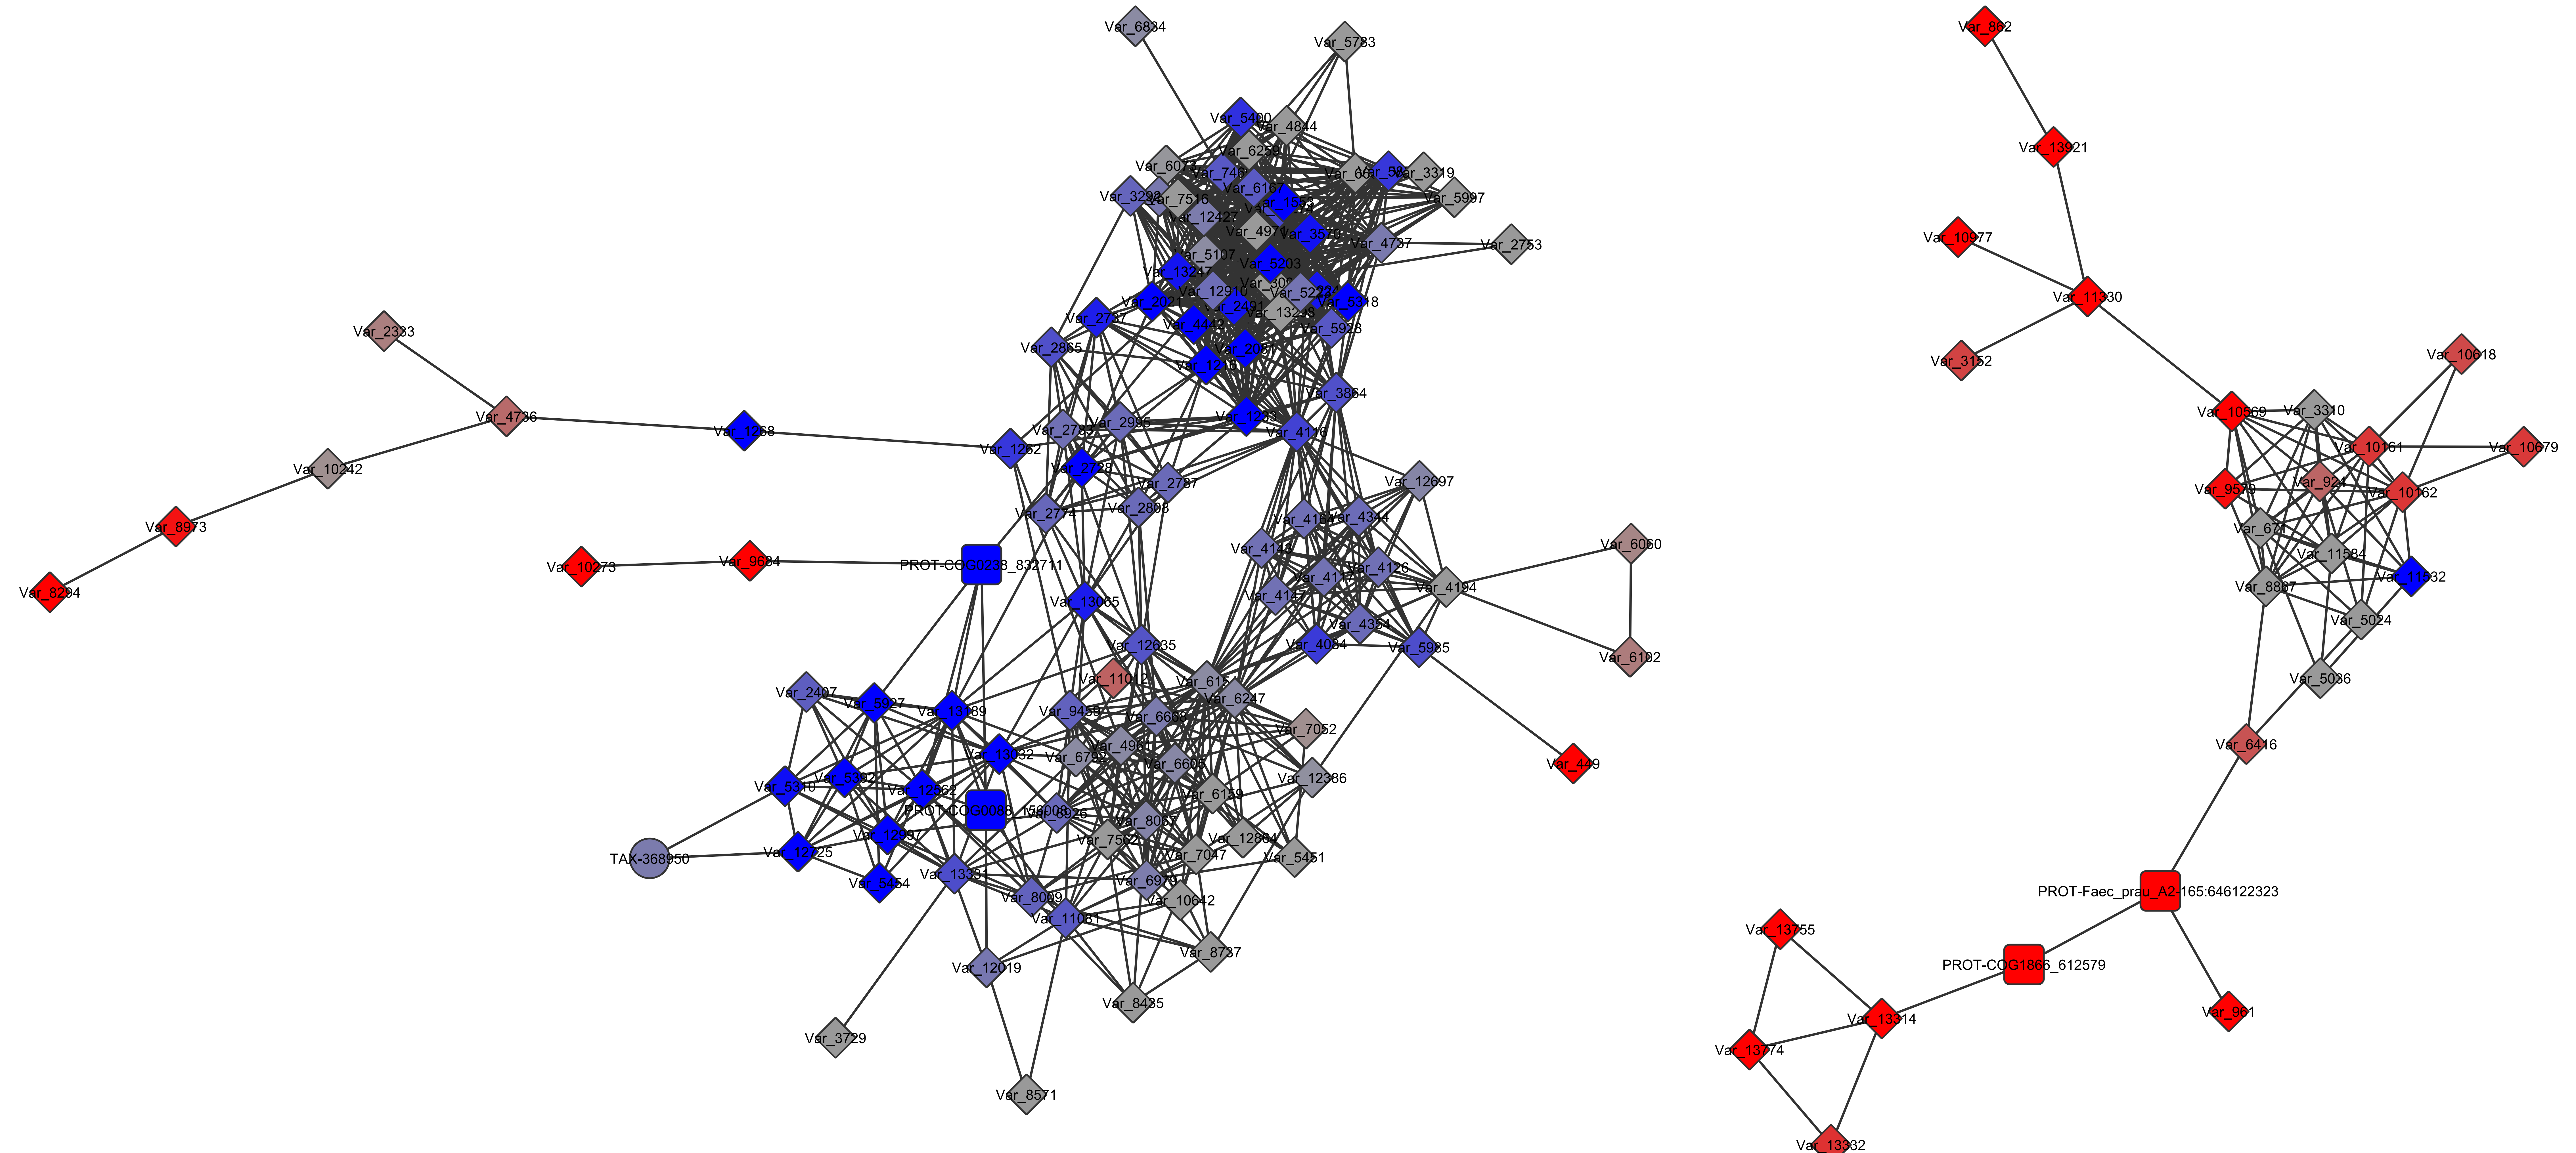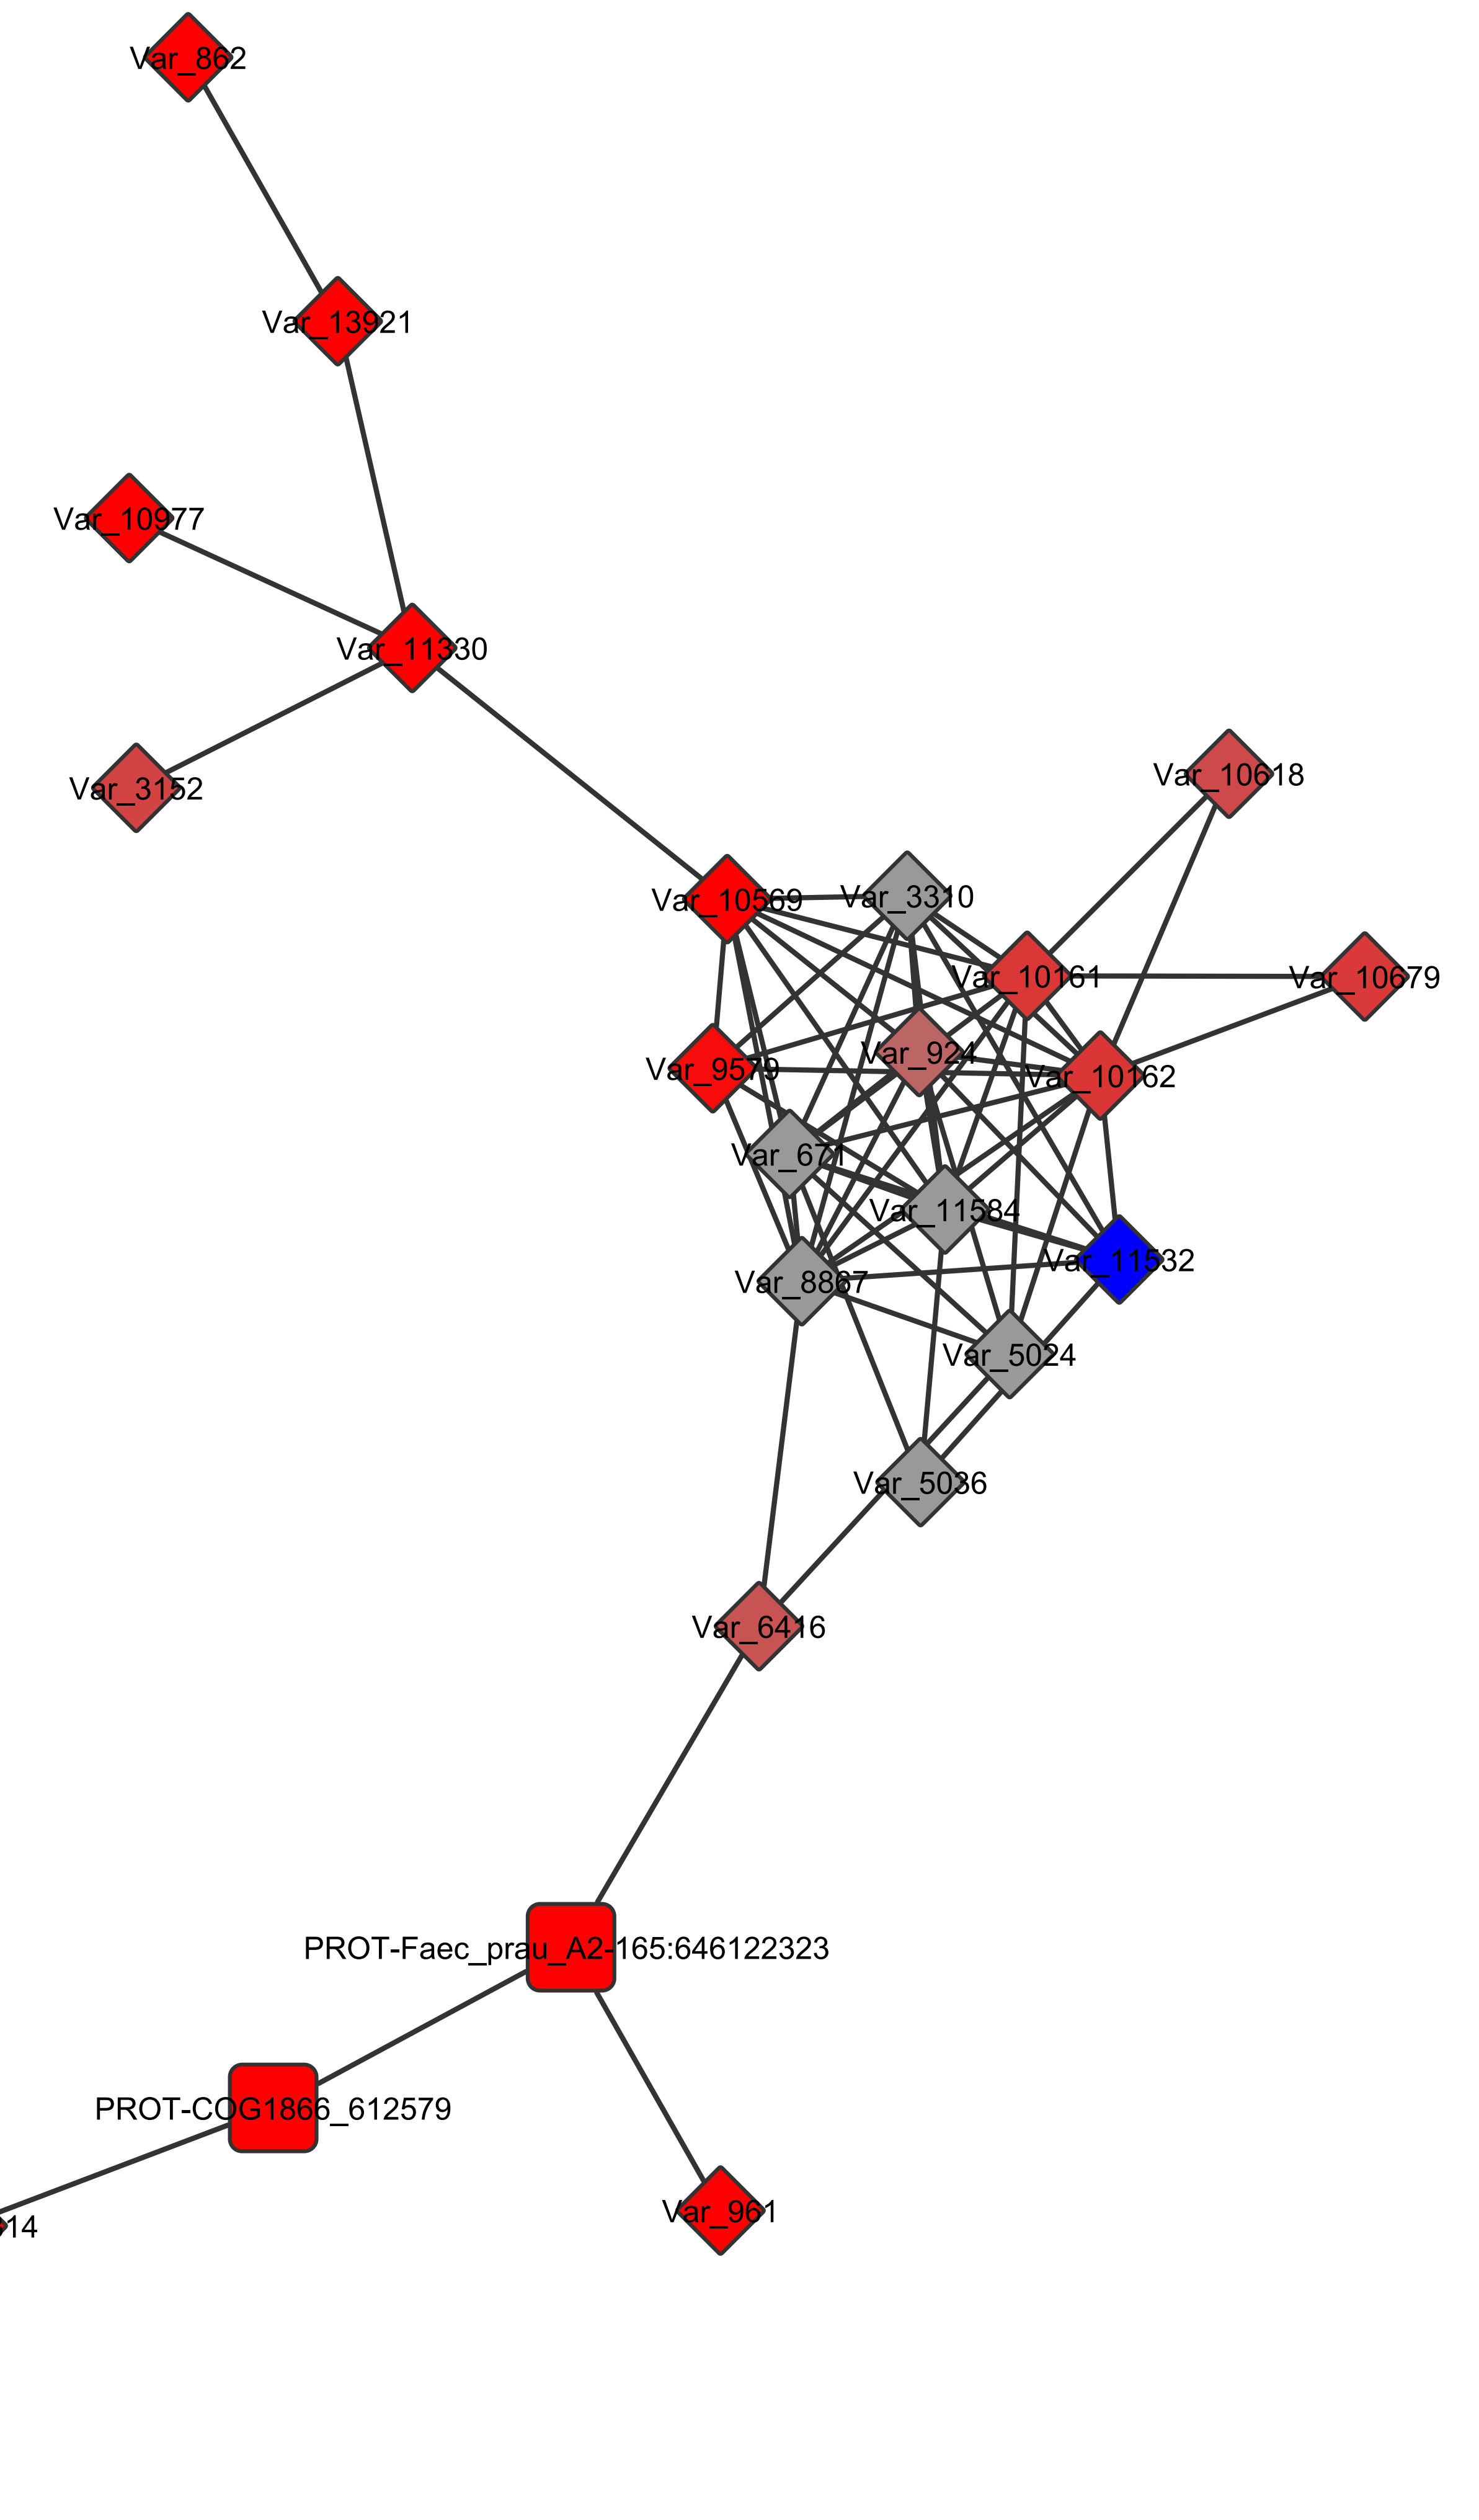

Supplement: mbo001173530sf8.pdf [file mbo001173530sf8.pdf]
